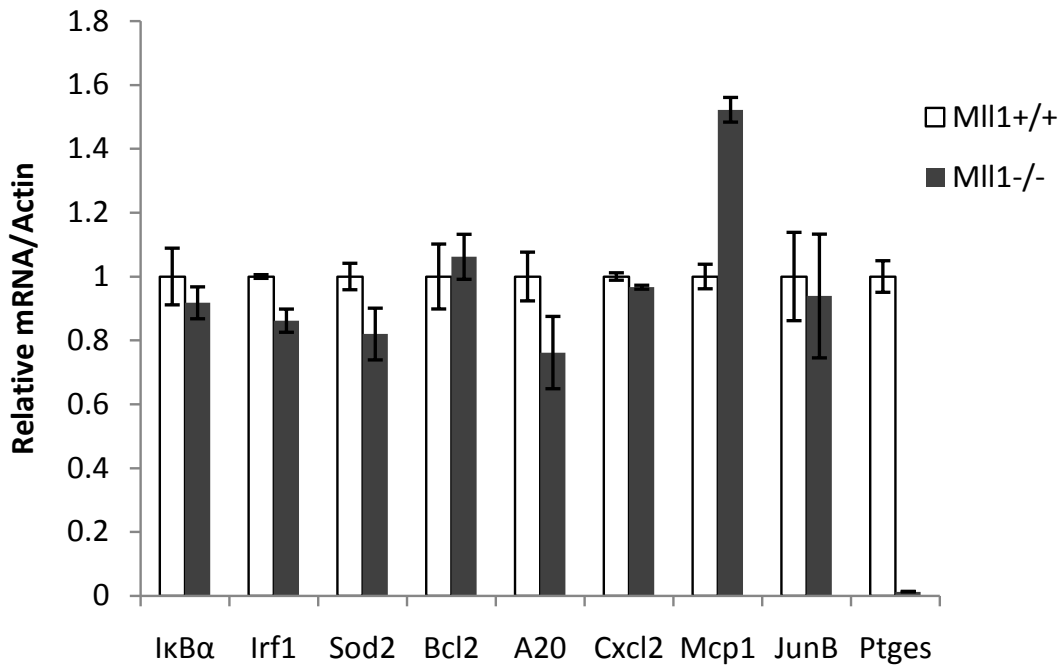

**Sup. Fig. 1** The basal mRNA level of NF-κB targeting genes in wide type and *Mll1*<sup>-/-</sup> cells.

The wide type and *Mll1*<sup>-/-</sup> cell were harvested and RT-PCR was performed to analyze the expression of indicated genes. Totally 40 reported NF-κB targeting genes were assayed (only part of data were presented). Among them, the expression of Ptges was significantly reduced.

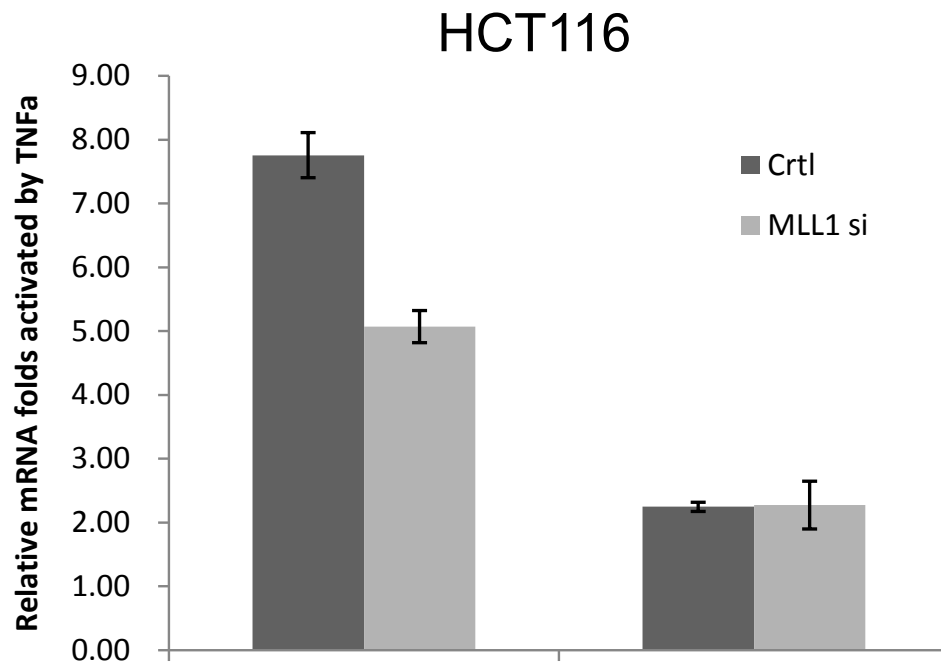

**Sup. Fig. 2 MLL1 regulated the activation of I $\kappa$ B $\alpha$  in HCT116 cell.** HCT116 cell was transiently transfected with MLL1 siRNA and treated by TNF $\alpha$  72hr after transfection. The elevated levels of I $\kappa$ B $\alpha$  and SOD2 mRNA were monitored by real time PCR.

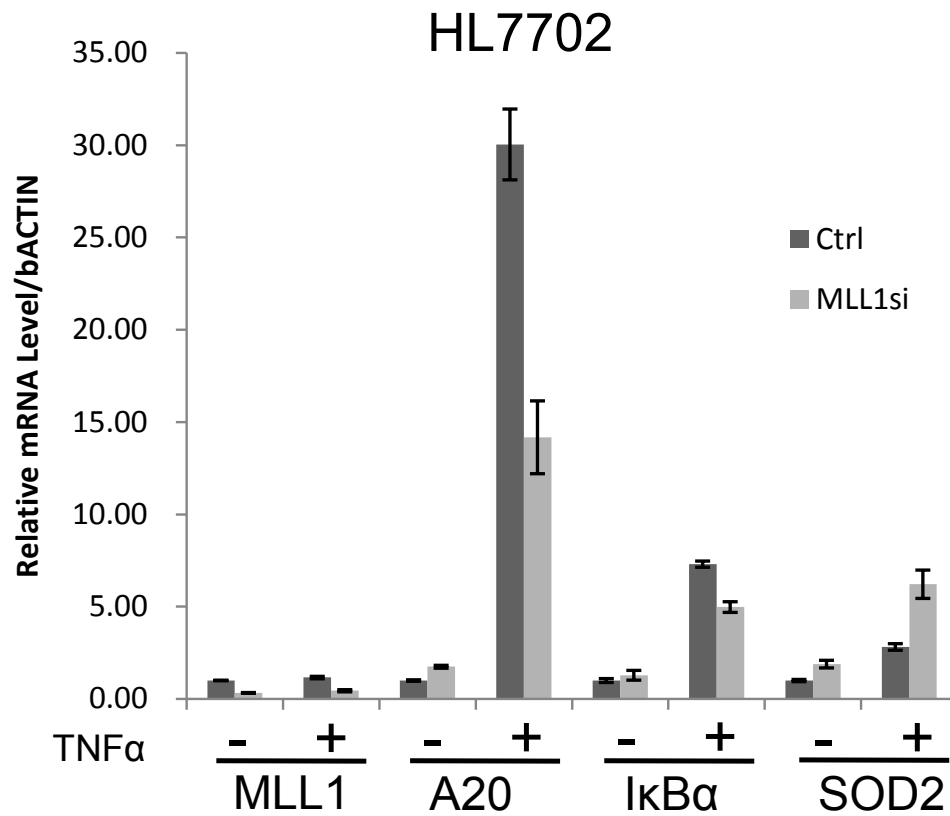

**Sup. Fig. 3 MLL1 regulated the activation of NFκB downstream genes in HL7702 cell.**

Immortalized liver cell HL7702 was transiently transfected with MLL1 siRNA and treated by TNFα 72hr after transfection. The elevated mRNA levels of indicated genes were assayed by real time PCR.

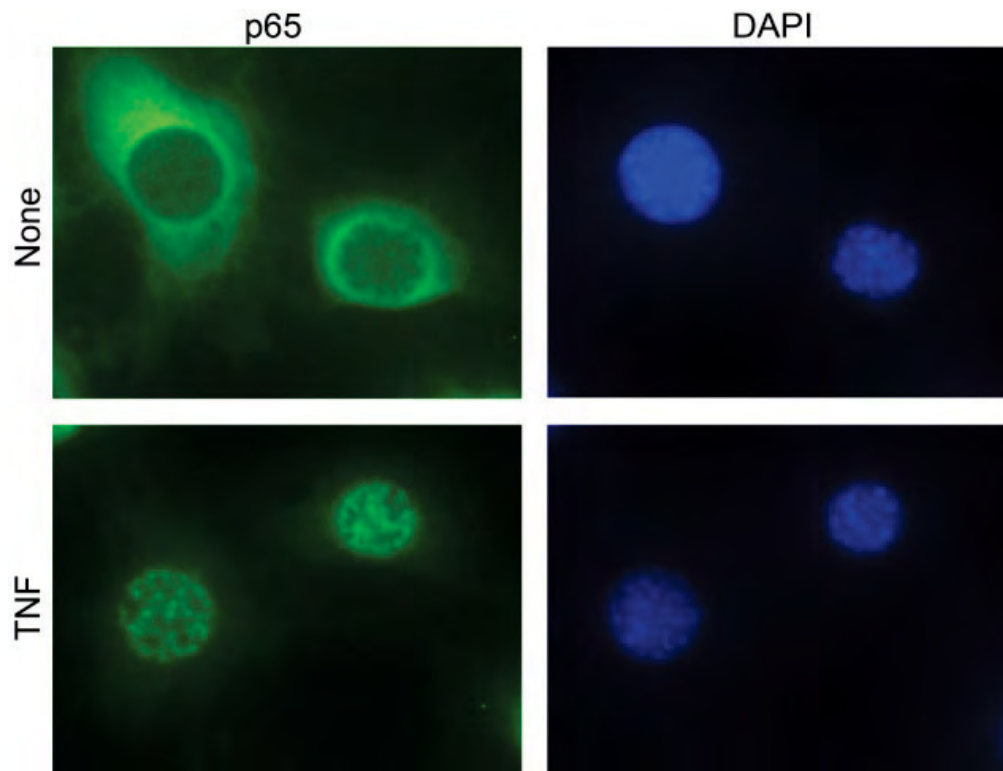

**Sup. Fig. 4 NF- $\kappa$ B was translocated into nuclear in *Mll1*<sup>-/-</sup> cell.** Immunofluorescent staining experiment was performed to study the localization of p65 in *Mll1*<sup>-/-</sup> cell. p65 is localized in the cytoplasm (upper) and translocated into nuclear (lower) after TNF $\alpha$  treatment, which is no difference from wide type cell.

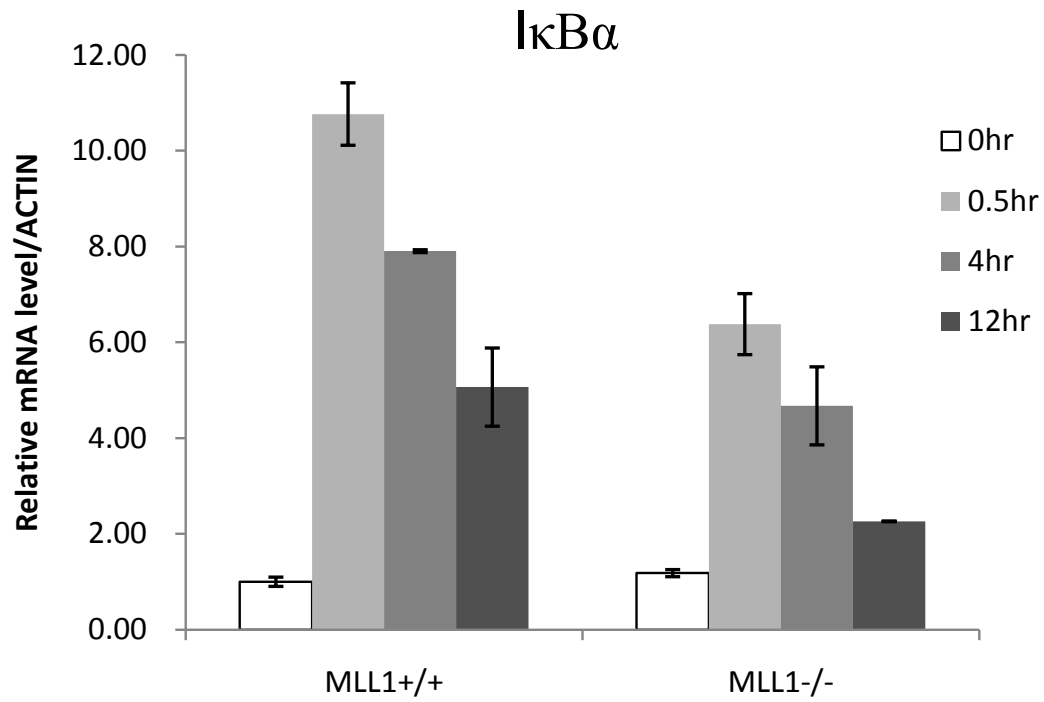

**Sup. Fig. 5** The  $I\kappa B\alpha$  mRNA level at different time points after TNF $\alpha$  treatment.  $MLL1^{+/+}$  and  $MLL1^{-/-}$  cells were treated with TNF and harvested at 0hr, 0.5hr, 4hr and 12hr. The  $I\kappa B\alpha$  mRNA levels were analyzed.

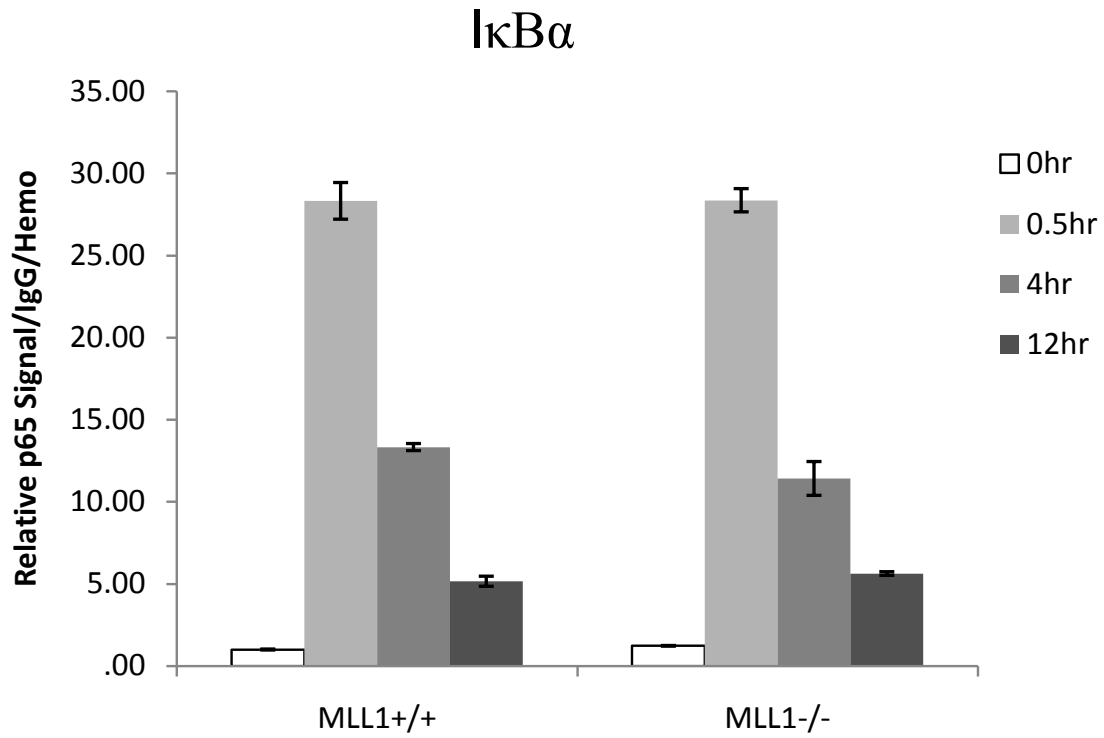

**Sup. Fig. 6 The bound p65 amount on  $I\kappa B\alpha$  promoter at different time points after TNF $\alpha$  treatment.** *MLL1*<sup>+/+</sup> and *MLL1*<sup>-/-</sup> cells were treated with TNF and harvested at 0hr, 0.5hr, 4hr and 12hr. The amount of p65 protein on  $I\kappa B\alpha$  promoter was analyzed by CHIP assay.

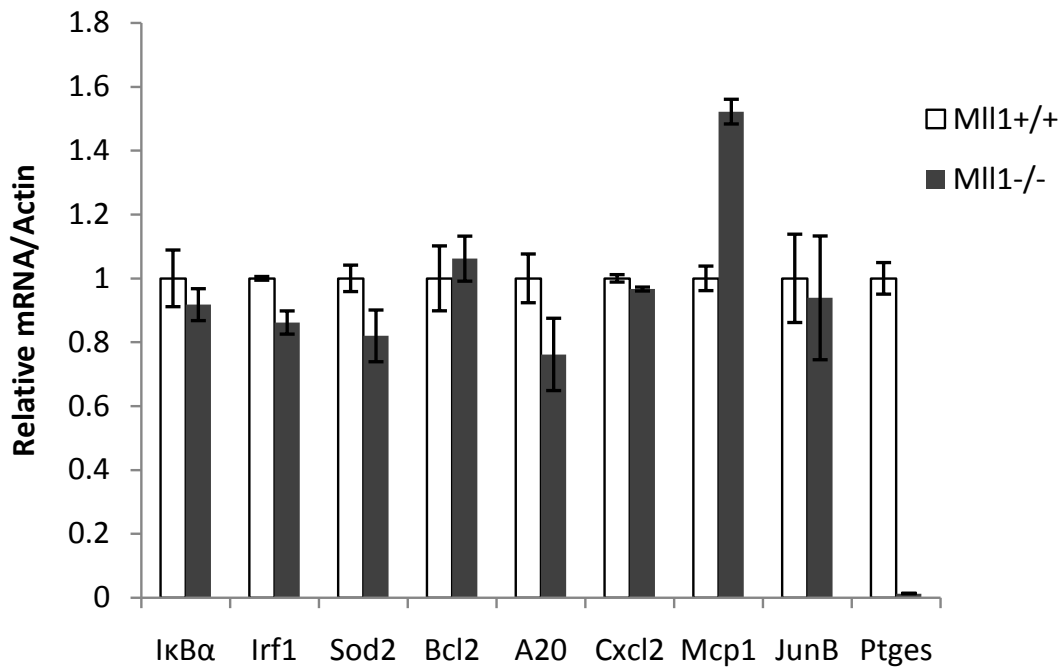

**Sup. Fig. 7** The amount of Wdr5 on Ikbα increased upon TNFα treatment in *Mll1*<sup>-/-</sup> cell.

ChIP assay was performed to analyze the amount of Wdr5 on Ikbα promoter. Wdr5 bound Ikbα promoter in wide type MEF and increased upon TNFα treatment. The bound Wdr5 decreased in *Mll1*<sup>-/-</sup> cell, but still increased after treatment.

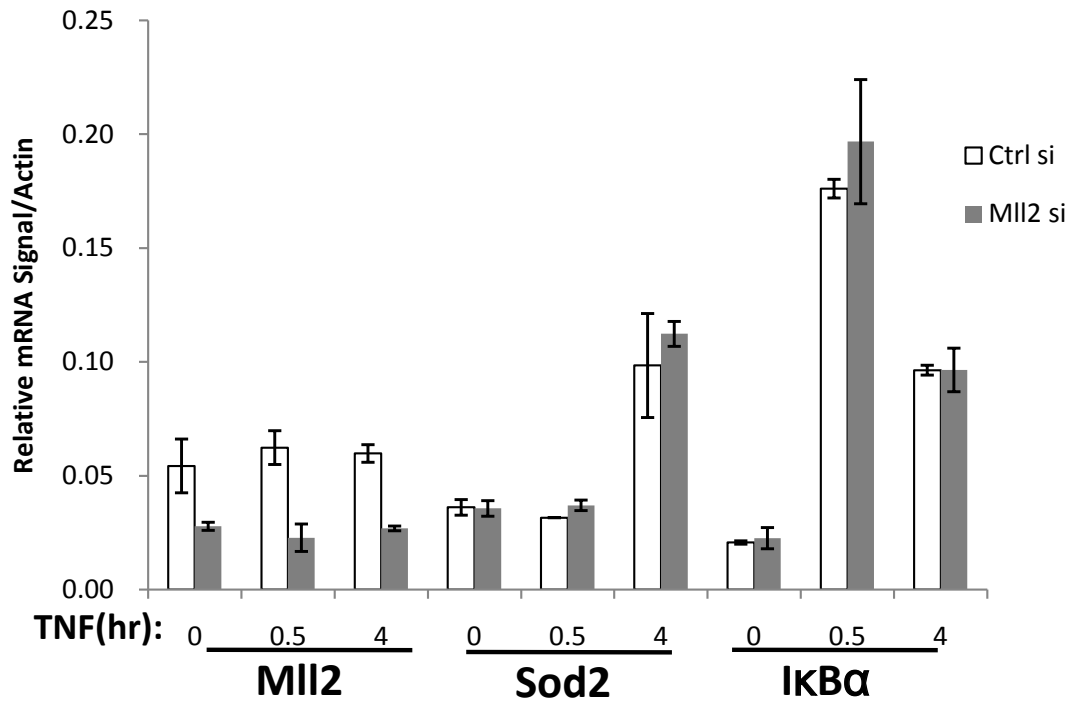

**Sup. Fig. 8 Mll2/HRX2 did not regulate the expression of *Ikbα* and *Sod2* in MEF cell.**

Mll2 was knocked down by siRNA in MEF cell and the mRNA levels of indicated genes were assayed by quantitative PCR following reverse transcription.



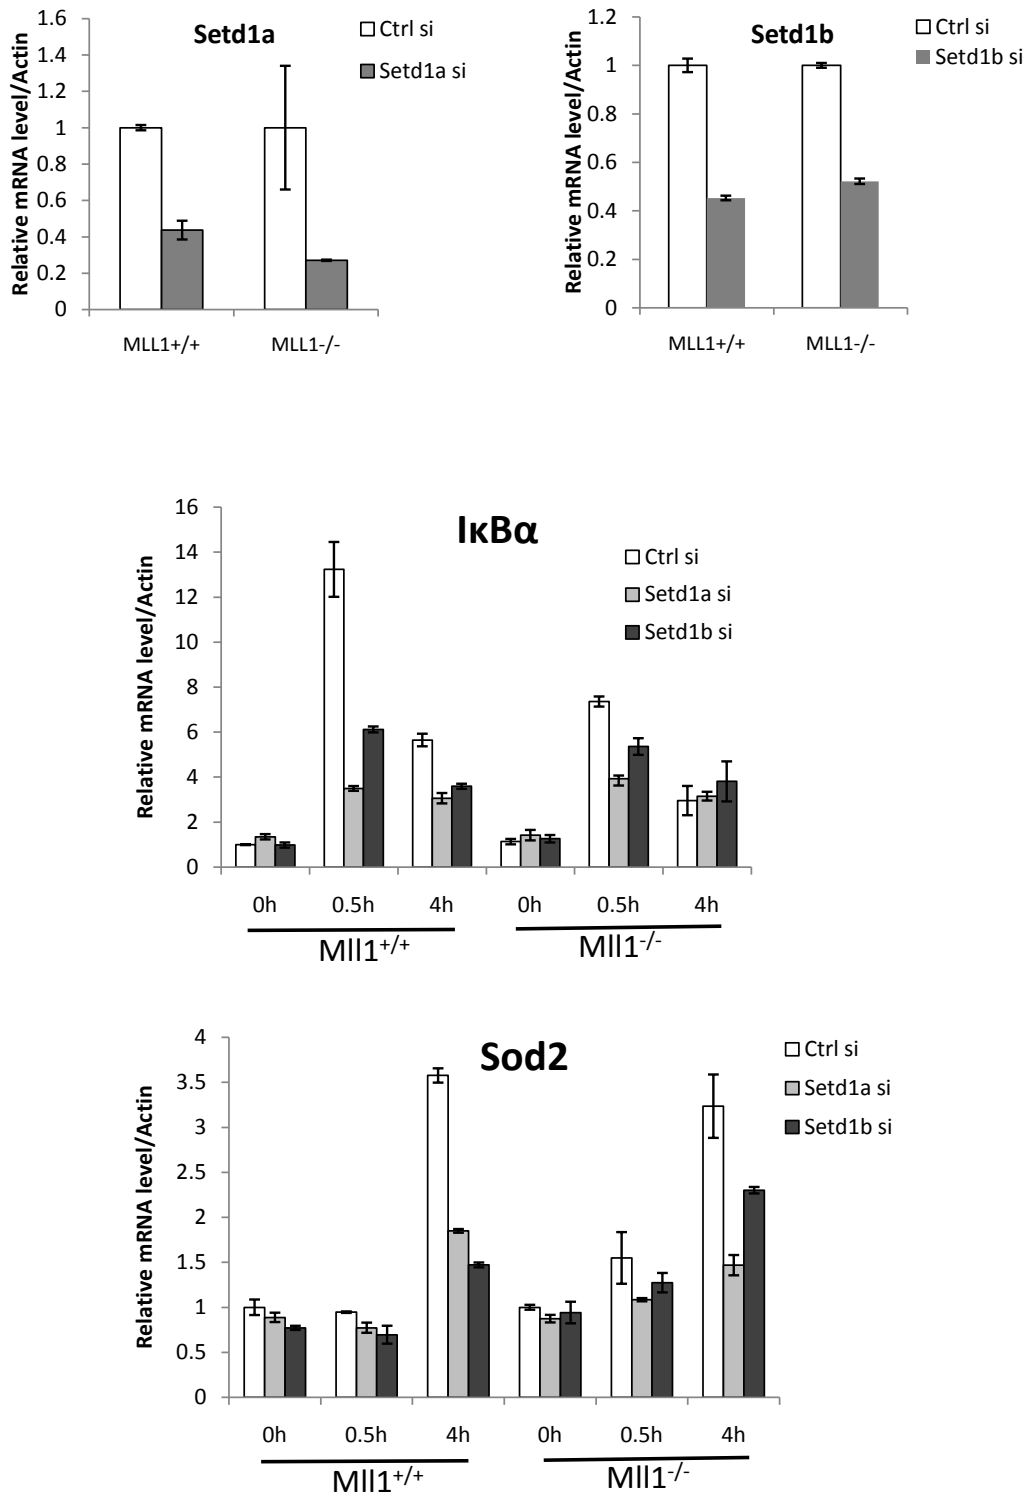

**Sup. Fig. 9** Setd1a and Setd1b regulated the expression of the expression of *IκBα* and *Sod2* in MEF cell. *Setd1a* and *Setd1b* were knocked down in *Mll1*<sup>+/+</sup> and *Mll1*<sup>-/-</sup> cells by siRNA respectively. The up panels showed the knockdown effect assayed by real time PCR. The middle and bottom showed that the expression of both *IκBα* (middle) and *Sod2* (bottom) were impaired with *Setd1a* or *Setd1b* deficiency.

## Supplementary Table 1

### The sequences of primers used in the study

| Primers for RT PCR |                      |                       |
|--------------------|----------------------|-----------------------|
| Gene               | Forward primer       | Reverse Primer        |
| mb-Actin           | aggtcatcactattggcaac | agaggtctttacggatgtca  |
| mWdr82             | CTCTAGCAGCGATGATGACT | GGTCCACACCGTACTTCTTA  |
| mM111              | ATGGGGAATGATGACAAGT  | GGTGACAGGCTTAATTGGT   |
| mM112              | AGCACAGTGTGGAGCTG    | AGCTGGTACAGAAGAGCAAG  |
| mM113              | CAAGCCTTATTTGATTCCAC | GTTCTTCCATTTGGCATATT  |
| mM114              | CATGGTGCCTGAAGATGT   | TCTCTGATGCTGATGACGTA  |
| mSet1A             | GTCATGGGCAACATCATT   | TGAGGAGTGTAAAGCCATT   |
| mp65               | ATGGCTACTATGAGGCTGAC | GTCTCGCTTCTTCACACACT  |
| mB94               | ATACCTACTTGCTGCTGCTC | GACACCTTGAAGCTCCTGT   |
| mPGES              | TACAGGAGTGACCCAGATGT | CGAGGAAGAGGAAAGGATAG  |
| mikBa              | TCCTCAACTCCAGAACAAC  | GGGTATTTCTCGAAAGTCT   |
| mSOD2              | ACACCATTTTCTGGACAAAC | CAAAGTCACGCTTGATAGC   |
| mMCP1              | CTGGAGCATCCACGTGTT   | CATCTTGCTGGTGAATGAG   |
| mIAP1              | ATAGAACACGCCAAATGGT  | GCTTGAATCTCATCAACAAAC |
| mCox2              | GTACCCGGACTGGATTCTAT | GGCTTCAGCAGTAATTTGAT  |
| mJunB              | CAGCTACTTTTCGGGTCAG  | GATCAAGCGCTCCAGTTC    |
| mC-myc             | tagtgctgcatgaggagac  | caccacatcaatttcttctct |
| mIL6               | cacatgttctctggaatc   | catcgttgttcatacaatcag |
| mTap1              | ACTCCTGCTTATCTTGGATG | CTTGGGGCTCTCATACAG    |
| mTAPBP             | TCTACCTGGCTACGGTACAC | GTGCTGGTGTAGAGACTC    |
| mTraf1             | ATGAGAGGAGAATACGATGC | GGTTGTTCTGGTCAAGTAGC  |
| mTraf2             | ACCGCTACTGCTCCTTCT   | TACAGGCCTTCATAGACACA  |
| mTraf3             | AAGCATCATCAAAGACAAGG | ATTCCGACAGTAGACCTGAA  |
| mGch1              | TAGTGATTGAAGCGACACAC | TGGTGTAGTGACAGTCTTG   |
| mGfpt2             | CCGAGGTTATGATGTTGACT | GGTGACGACAGTCTTGTGAT  |
| mKlrc2             | GCTGAACTGAAGAAGCAGAT | TTGGACAATGAGGACAAG    |
| mIcam1             | CACGCTACCTCTGCTCCT   | GGATGGATGGATACCTGAG   |
| mI127ra            | TTCTGCTGTCGCTGATGT   | GACCGACGCTGTAGCACT    |
| mNFkB1             | CTGAGTCCTGCTCCTTCTAA | CTGTGTAGCCCATCTGTTG   |
| mNFkB2             | TGGACACATACAGGAAGACC | CAATAGACCCACCAAGTCC   |
| mcRel              | AGAACTGTGGAAGTGTGAGG | GTCATTCAACACAAAACGAA  |
| mTrim16            | GAACTCAAGTGTCTGCCATT | TGTCACAGGCATATTGAAGA  |
| mTnip1             | CTGTCACCACCGACATCT   | GTAGCAGGATGTACCTGGAC  |
| mCyb5              | GTCTAATTCAGTTGGTGGA  | AAGTCAATCTTCTGCCATGT  |

|          |                             |                             |
|----------|-----------------------------|-----------------------------|
| mPsmb9   | ACGGAAGAAGTCCACACC          | GAATCAGAGCCCACCAC           |
| mCxc12   | ACGGAAGAACCAAAGAGAA         | AAATAAGTGAACTCTCAGACAGC     |
| mTNFa    | TACTGAACTTCGGGGTGAT         | GCCATAGAAGTATGAGAGG         |
| mBID     | CCTTCAACCAAGGAAGAATA        | CGAGATGTCTGGCAATGT          |
| mCtgf    | GTGTGTGACGAGCCCAAG          | GCCAAATGTGTCTTCCAGT         |
| hb-Actin | GATCCACATCTGCTGGAAG         | CAGCACAATGAAGATCAAGA        |
| hWdr82   | CTCCATCGTGCTCTATGACT        | GATGAGGTCCACACCATATT        |
| hMLL1    | <b>cgggaaaagtattacgacag</b> | <b>cacacgagtgattgatgaag</b> |
| hMl12    | TGTGCTCTATGCCAACATTA        | TTCTCCAGAGCTTCATGATT        |
| hMLL3    | <b>gtttggagtatcgacagcat</b> | <b>tatccagaaagaccattgct</b> |
| hMl14    | GACTGGAAAGCAGAAGTCTC        | AGCCACACGTTCTCTAAATC        |
| hSetd1A  | <b>acagtgacctgctgaaactc</b> | <b>acgtattcgatgacctctc</b>  |
| hSetd1b  | <b>acagtgacctgctcaagttc</b> | <b>acgtactcgatgacctctc</b>  |
| hp65     | CTGGAGCAGGCTATCAGTC         | ACAGCATTCAGGTCGTAGTC        |
| hB94     | ACCTACATGCTGCTGCTC          | CCATACCCTGCAGCTCAC          |
| hIkBa    | GTCTTGGGTGCTGATGT           | GAGAATAGCCCTGGTAGGTAA       |
| hSOD2    | GCACGTTACTACCTTCAGT         | CTCCAGTTGATTACATTCC         |
| hI16     | AACCTGAACCTTCAAAGAT         | ACTCCAAAAGACCAGTGATG        |
| hcIAP1   | GCCATCTAGTGTCCAGTTC         | AGCATTTGACATCATCATTG        |
| hcIAP2   | TCAAGTTCAAGCCAGTTACC        | GACTCTGCATTTTCATCTCC        |
| hCox2    | CCAGACAAGCAGGCTAATAC        | TGATAGCCACTCAAGTGTTG        |
| hJunB    | CGACGACTCATACACAGCTA        | TCGGTTTCAGGAGTTGTAG         |
| hTap1    | GTGGTCCTCTCCTCTTTG          | TGAGCCATCTGTAGAAATCC        |
| hTAPBP   | GTCCCTGTCTCTGCTCCT          | CTCCACGAACCAACACTC          |
| hTraf1   | CCACCTCTATCCACCAGAG         | CAGGGTCTGCTGAAGCTC          |
| hTraf2   | CAAGATTGAAGCCCTGAGTA        | ATCTCCAAGACCTTCTGCTC        |
| hTraf3   | GGAGAGCGTGGACAAGAG          | CACACTCAGCATCTGGTCAT        |
| hGch1    | CTACCAGGAGACCATCTCAG        | TATGTCCTTACAATCACCA         |
| hGfpt2   | ACAAGCTCTCCACAGAACAG        | CCTCTTCATCCGTGTCTTAC        |
| hKlrc2   | TATGACTGCCAAGGTTACTG        | ATCAGGACAATGCAAATGAT        |
| hIcam1   | GTGACCATCTACAGCTTCC         | TCACACTTACTGTACCTC          |
| hI127ra  | CTCTCACCAACCTCTCTTTG        | ACCAGTAGCTCCGTGCTC          |
| hNFkB1   | TGGTATCAGACGCCATCTA         | GCTGTCTGTCCATTCTTAC         |
| hNFkB2   | AATTGAACTCCTCATTGTG         | CCTCTCTGCTTAGGCTGTT         |
| hcRel    | TTCTGACCAGGAAGTTAGTGA       | TTTGCTTTATTGCCGTAAGT        |
| hTrim16  | ACACCATAGTCTCCCTGGAT        | GATGGCATTTCATTCAACT         |
| hTnip1   | AATGCAAGGGATAAAGATGT        | TTGTCCTTCACTAGCTCCTC        |
| hCyb5    | ACAAGGTGTACGATTTGACC        | GTTCTCAGTAGCGTCACCTC        |
| hPsmb9   | ATCGAGAGGACTTGCTGTC         | GGTTCCATATACCTGACCT         |
| hCxc12   | CAAGAACATCCAAAGTGTGA        | CCATTCTTGAGTGTGGCTAT        |

|                  |                      |                      |
|------------------|----------------------|----------------------|
| hCtgf            | GAGTGGGTGTGTGACGAG   | CGTGTCTTCCAGTCGGTA   |
|                  |                      |                      |
| Primers for ChIP |                      |                      |
| Name             | Forward              | Reverse              |
| mHemob           | CTTTGGGCATCTAGCTTTTA | AATCCTTGCAAGAAACAAAA |
| mIkBapro         | GAGGACTTTCCAGCCACTCA | GCTCGTCCTCCACTGAGAAG |
| mSOD2proF        | AGTCTCAGGGGCAACAAAGA | GCCCCTCTGACCCAGTTAAT |
| mI16pro          | gggatgtctgtagctcattc | gcagagaggaacttcatagc |
| mTnip1pro        | CCTGCAGAAGCTCAGAAA   | ACGAGGTGATCTGAAGATGT |
| mA20pro          | catggatgtgacgtggaa   | cggagaaactcctaggtc   |
| mMcp1pro         | ccacagtttctctcttccac | atcacctggataagtgatg  |

Supplementray Table 2 Differential expressed genes of MEF wide type cell with or without TNF  $\alpha$ 

| ID        | ACCESSION NUMBER | NAME                                                            | TNF     | Ctrl    | FOLDCHANGE |
|-----------|------------------|-----------------------------------------------------------------|---------|---------|------------|
| 17260     | NM 001170537.1   | myocyte enhancer factor 2C                                      | 0.0000  | 0.0449  | 0.0000     |
| 73887     | XR 106601.1      | RIKEN cDNA 4930417022 gene                                      | 0.0000  | 0.2437  | 0.0000     |
| 73887     | XR 106411.1      | RIKEN cDNA 4930417022 gene                                      | 0.0000  | 0.2437  | 0.0000     |
| 100504427 | XR 104672.1      | predicted gene 13404                                            | 0.0182  | 0.2388  | 0.0762     |
| 100504427 | XR 107364.1      | predicted gene 13404                                            | 0.0183  | 0.2211  | 0.0826     |
| 78445     | XR 106969.1      | RIKEN cDNA C330013E15 gene                                      | 0.1018  | 0.7192  | 0.1416     |
| 78445     | XR 105710.1      | RIKEN cDNA C330013E15 gene                                      | 0.1018  | 0.7192  | 0.1416     |
| 442801    | NM 177566.3      | Rho guanine nucleotide exchange factor (GEF) 15                 | 0.0255  | 0.1455  | 0.1749     |
| 69903     | NM 028544.1      | Ras interacting protein 1                                       | 0.0564  | 0.2390  | 0.2360     |
| 100342    | NM 175307.6      | family with sequence similarity 46, member B                    | 0.1406  | 0.5044  | 0.2788     |
| 56379     | NM 019659.3      | potassium inwardly-rectifying channel, subfamily J, member 1    | 0.0931  | 0.3286  | 0.2832     |
| 56379     | NM 001168354.1   | potassium inwardly-rectifying channel, subfamily J, member 1    | 0.0930  | 0.3284  | 0.2832     |
| 11606     | NM 007428.3      | angiotensinogen (serpin peptidase inhibitor, clade A, member 8) | 0.1926  | 0.6801  | 0.2832     |
| 14747     | NM 008153.3      | chemokine-like receptor 1                                       | 0.8669  | 2.5226  | 0.3437     |
| 22403     | NM 016873.2      | WNT1 inducible signaling pathway protein 2                      | 0.4007  | 1.0714  | 0.3740     |
| 11754     | NM 009675.2      | amine oxidase, copper containing 3                              | 0.1870  | 0.4676  | 0.3999     |
| 100503611 | XM 003084596.1   | -                                                               | 0.6688  | 1.4808  | 0.4516     |
| 100039781 | NM 027511.1      | histidine rich carboxyl terminus 1                              | 2.1003  | 4.5465  | 0.4620     |
| 64929     | NM 022886.2      | sciellin                                                        | 0.6556  | 1.2876  | 0.5092     |
| 22417     | NM 009523.1      | wingless-related MMTV integration site 4                        | 2.9543  | 5.6667  | 0.5213     |
| 56745     | NM 019959.2      | Clq and tumor necrosis factor related protein 1                 | 1.6079  | 3.0580  | 0.5258     |
| 100042198 | XR 104937.1      | predicted gene 3716                                             | 0.9085  | 1.7203  | 0.5281     |
| 100042198 | XR 107688.1      | predicted gene 3716                                             | 1.0012  | 1.8815  | 0.5321     |
| 15902     | NM 010496.3      | inhibitor of DNA binding 2                                      | 12.2842 | 22.8301 | 0.5381     |
| 105844    | NM 130859.2      | caspase recruitment domain family, member 10                    | 1.7540  | 3.2205  | 0.5446     |
| 70788     | NM 027551.2      | kelch-like 30 (Drosophila)                                      | 2.9826  | 5.4573  | 0.5465     |
| 23882     | NM 011817.2      | growth arrest and DNA-damage-inducible 45 gamma                 | 12.7631 | 23.2863 | 0.5481     |
| 68169     | NM 172399.3      | RIKEN cDNA A930038C07 gene                                      | 3.8765  | 7.0064  | 0.5533     |

|        |                |                                                           |         |         |        |
|--------|----------------|-----------------------------------------------------------|---------|---------|--------|
| 14181  | NM 008009.3    | fibroblast growth factor binding protein 1                | 3.7718  | 6.8084  | 0.5540 |
| 329540 | NM 001001986.2 | RIKEN cDNA 8430427H17 gene                                | 1.1553  | 2.0751  | 0.5567 |
| 13653  | NM 007913.5    | early growth response 1                                   | 1.1868  | 2.1249  | 0.5585 |
| 12159  | NM 007554.2    | bone morphogenetic protein 4                              | 4.9474  | 8.7537  | 0.5652 |
| 71093  | NM 153778.3    | atonal homolog 8 (Drosophila)                             | 4.1587  | 7.3353  | 0.5669 |
| 17130  | NM 008542.3    | MAD homolog 6 (Drosophila)                                | 2.3821  | 4.1757  | 0.5705 |
| 329540 | NM 001134300.2 | RIKEN cDNA 8430427H17 gene                                | 1.0585  | 1.8549  | 0.5706 |
| 68404  | NM 153529.1    | neuritin 1                                                | 9.8921  | 17.1447 | 0.5770 |
| 76969  | NM 023850.2    | carbohydrate (keratan sulfate Gal-6) sulfotransferase 1   | 10.1686 | 17.5478 | 0.5795 |
| 231861 | NM 001122730.1 | trinucleotide repeat containing 18                        | 3.2867  | 5.5961  | 0.5873 |
| 223650 | NM 144848.2    | epiplakin 1                                               | 0.6346  | 1.0706  | 0.5928 |
| 231861 | NM 178242.2    | trinucleotide repeat containing 18                        | 2.4112  | 4.0547  | 0.5947 |
| 271221 | NM 198642.2    | RIKEN cDNA 5031414D18 gene                                | 3.7752  | 6.2986  | 0.5994 |
| 74760  | NM 144538.2    | RAB3A interacting protein (rabin3)-like 1                 | 5.1150  | 8.3631  | 0.6116 |
| 380912 | NM 199029.2    | zinc finger protein 395                                   | 2.6201  | 4.2724  | 0.6133 |
| 14200  | NM 010212.3    | four and a half LIM domains 2                             | 13.6753 | 22.2197 | 0.6155 |
| 15426  | NM 010466.2    | homeobox C8                                               | 6.8197  | 11.0521 | 0.6171 |
| 77889  | NM 029999.4    | limb-bud and heart                                        | 3.1456  | 5.0193  | 0.6267 |
| 19252  | NM 013642.3    | dual specificity phosphatase 1                            | 15.8758 | 25.1264 | 0.6318 |
| 70445  | NM 054042.2    | CD248 antigen, endosialin                                 | 11.5292 | 18.1946 | 0.6337 |
| 21825  | NM 011580.3    | thrombospondin 1                                          | 51.2370 | 80.6369 | 0.6354 |
| 16582  | NM 010631.2    | kinesin family member C3                                  | 4.3592  | 6.7345  | 0.6473 |
| 16582  | NM 001145831.1 | kinesin family member C3                                  | 4.1775  | 6.4013  | 0.6526 |
| 16582  | NM 001145832.1 | kinesin family member C3                                  | 4.7334  | 7.1883  | 0.6585 |
| 170676 | NM 001040611.1 | paternally expressed 10                                   | 3.8115  | 5.7253  | 0.6657 |
| 170676 | NM 130877.2    | paternally expressed 10                                   | 3.8115  | 5.7253  | 0.6657 |
| 67306  | NM 173181.3    | family with sequence similarity 164, member A             | 24.2472 | 36.0316 | 0.6729 |
| 104445 | NM 027219.3    | CDC42 effector protein (Rho GTPase binding) 1             | 18.9825 | 27.8494 | 0.6816 |
| 53881  | NM 017391.3    | solute carrier family 5 (inositol transporters), member 3 | 13.5437 | 19.4589 | 0.6960 |
| 18596  | NM 001146268.1 | platelet derived growth factor receptor, beta polypeptide | 13.0414 | 18.5416 | 0.7034 |

|           |                |                                                                   |          |          |        |
|-----------|----------------|-------------------------------------------------------------------|----------|----------|--------|
| 18596     | NM 008809.2    | platelet derived growth factor receptor, beta polypeptide         | 13.0684  | 18.5585  | 0.7042 |
| 57265     | NM 020510.2    | frizzled homolog 2 (Drosophila)                                   | 11.0146  | 15.6363  | 0.7044 |
| 94242     | NM 001168333.1 | tubulointerstitial nephritis antigen-like 1                       | 43.7188  | 61.8658  | 0.7067 |
| 14313     | NM 008046.2    | follistatin                                                       | 26.5054  | 37.4681  | 0.7074 |
| 94242     | NM 023476.3    | tubulointerstitial nephritis antigen-like 1                       | 40.5717  | 57.2028  | 0.7093 |
| 20410     | NM 011366.2    | sorbin and SH3 domain containing 3                                | 18.2764  | 25.7422  | 0.7100 |
| 20346     | NM 009152.3    | sema domain, immunoglobulin domain (Ig), short basic domain, secr | 11.6199  | 16.1153  | 0.7210 |
| 11826     | NM 007472.2    | aquaporin 1                                                       | 78.5188  | 108.0738 | 0.7265 |
| 100503984 | XR 107221.1    | -                                                                 | 704.9197 | 524.9652 | 1.3428 |
| 75788     | NM 001038627.1 | SMAD specific E3 ubiquitin protein ligase 1                       | 30.0263  | 22.2618  | 1.3488 |
| 75788     | NM 029438.3    | SMAD specific E3 ubiquitin protein ligase 1                       | 29.9830  | 22.2181  | 1.3495 |
| 100503946 | XR 107210.1    | -                                                                 | 736.1257 | 543.3139 | 1.3549 |
| 15364     | NM 010441.2    | high mobility group AT-hook 2                                     | 151.6343 | 110.8795 | 1.3676 |
| 83946     | NM 001081216.1 | pleckstrin homology domain interacting protein                    | 11.8800  | 8.6521   | 1.3731 |
| 328949    | NM 001085373.1 | mutated in colorectal cancers                                     | 10.4393  | 7.5425   | 1.3841 |
| 328949    | NM 001085374.1 | mutated in colorectal cancers                                     | 10.6870  | 7.7204   | 1.3843 |
| 19791     | NR 003278.1    | 18S ribosomal RNA                                                 | 499.2789 | 360.4836 | 1.3850 |
| 17118     | NM 008538.2    | myristoylated alanine rich protein kinase C substrate             | 27.3839  | 19.6516  | 1.3935 |
| 67073     | NM 025951.2    | phosphatidylinositol 4-kinase type 2 beta                         | 21.1863  | 15.2003  | 1.3938 |
| 218454    | NM 172589.2    | lipoma HMGIC fusion partner-like 2                                | 26.8897  | 19.2346  | 1.3980 |
| 67073     | NM 028744.2    | phosphatidylinositol 4-kinase type 2 beta                         | 20.6771  | 14.7820  | 1.3988 |
| 215449    | NM 024457.2    | RAS related protein 1b                                            | 314.0320 | 224.2397 | 1.4004 |
| 16880     | NM 013584.2    | leukemia inhibitory factor receptor                               | 10.2795  | 7.3299   | 1.4024 |
| 18828     | NM 008880.2    | phospholipid scramblase 2                                         | 56.8543  | 40.5030  | 1.4037 |
| 26921     | NM 008696.2    | mitogen-activated protein kinase kinase kinase kinase 4           | 39.3240  | 27.9976  | 1.4046 |
| 20348     | NM 013657.5    | sema domain, immunoglobulin domain (Ig), short basic domain, secr | 60.1780  | 42.8094  | 1.4057 |
| 12977     | NM 001113530.1 | colony stimulating factor 1 (macrophage)                          | 124.2404 | 87.9714  | 1.4123 |
| 226525    | NM 177644.5    | RAS protein activator like 2                                      | 4.7036   | 3.3242   | 1.4150 |
| 16476     | NM 010591.2    | Jun oncogene                                                      | 19.2680  | 13.5904  | 1.4178 |
| 12977     | NM 007778.4    | colony stimulating factor 1 (macrophage)                          | 159.7792 | 112.5273 | 1.4199 |

|        |                |                                                                   |          |          |        |
|--------|----------------|-------------------------------------------------------------------|----------|----------|--------|
| 14182  | NM 001079909.1 | fibroblast growth factor receptor 1                               | 20.2126  | 14.2323  | 1.4202 |
| 14182  | NM 010206.2    | fibroblast growth factor receptor 1                               | 19.9201  | 13.9416  | 1.4288 |
| 24136  | NM 015753.3    | zinc finger E-box binding homeobox 2                              | 6.3854   | 4.4639   | 1.4304 |
| 14182  | NM 001079908.1 | fibroblast growth factor receptor 1                               | 19.8939  | 13.9006  | 1.4312 |
| 13486  | NM 026106.4    | down-regulator of transcription 1                                 | 29.4534  | 20.5493  | 1.4333 |
| 208846 | NM 172464.2    | dishevelled associated activator of morphogenesis 1               | 7.5518   | 5.2661   | 1.4341 |
| 12977  | NM 001113529.1 | colony stimulating factor 1 (macrophage)                          | 163.4552 | 113.8839 | 1.4353 |
| 208846 | NM 026102.2    | dishevelled associated activator of morphogenesis 1               | 7.4237   | 5.1657   | 1.4371 |
| 17936  | NM 008667.3    | Ngfi-A binding protein 1                                          | 18.9093  | 13.1578  | 1.4371 |
| 78388  | NM 080638.3    | major vault protein                                               | 18.0370  | 12.4491  | 1.4489 |
| 20912  | NM 011504.1    | syntaxin binding protein 3A                                       | 13.6674  | 9.4132   | 1.4520 |
| 140780 | NM 080708.1    | BMP2 inducible kinase                                             | 6.9804   | 4.8030   | 1.4533 |
| 54216  | NM 001122758.1 | protocadherin 7                                                   | 11.4650  | 7.8501   | 1.4605 |
| 21664  | NM 009344.3    | pleckstrin homology-like domain, family A, member 1               | 32.8883  | 22.4914  | 1.4623 |
| 12457  | NM 009834.2    | CCR4 carbon catabolite repression 4-like ( <i>S. cerevisiae</i> ) | 9.8646   | 6.7216   | 1.4676 |
| 22762  | NM 011766.5    | zinc finger protein, multitype 2                                  | 17.5195  | 11.8835  | 1.4743 |
| 20971  | NM 011521.2    | syndecan 4                                                        | 59.1218  | 39.9927  | 1.4783 |
| 30953  | NM 001113419.1 | schwannomin interacting protein 1                                 | 11.1351  | 7.5303   | 1.4787 |
| 268396 | NM 177364.3    | SH3 and PX domains 2B                                             | 12.3986  | 8.3803   | 1.4795 |
| 15979  | NM 010511.2    | interferon gamma receptor 1                                       | 44.6664  | 30.1706  | 1.4805 |
| 16195  | NM 010560.3    | interleukin 6 signal transducer                                   | 62.4263  | 42.1626  | 1.4806 |
| 30953  | NM 001113421.1 | schwannomin interacting protein 1                                 | 11.9842  | 8.0936   | 1.4807 |
| 14042  | NM 010162.2    | exostoses (multiple) 1                                            | 51.4466  | 34.5395  | 1.4895 |
| 16423  | NM 010581.3    | CD47 antigen (Rh-related antigen, integrin-associated signal tran | 49.6476  | 33.2580  | 1.4928 |
| 380711 | NM 001015046.2 | RAP1 GTPase activating protein 2                                  | 6.7583   | 4.5178   | 1.4959 |
| 18412  | NM 011018.2    | sequestosome 1                                                    | 389.4593 | 260.1461 | 1.4971 |
| 23872  | NM 011809.3    | E26 avian leukemia oncogene 2, 3' domain                          | 33.3136  | 22.1853  | 1.5016 |
| 21928  | NM 009396.2    | tumor necrosis factor, alpha-induced protein 2                    | 28.1665  | 18.7552  | 1.5018 |
| 20496  | NM 009194.3    | solute carrier family 12, member 2                                | 53.6863  | 35.5881  | 1.5085 |
| 30953  | NM 001113420.1 | schwannomin interacting protein 1                                 | 15.3918  | 10.1965  | 1.5095 |



|           |                |                                                                    |          |         |        |
|-----------|----------------|--------------------------------------------------------------------|----------|---------|--------|
| 30953     | NM 013928.5    | schwannomin interacting protein 1                                  | 14.5393  | 9.6318  | 1.5095 |
| 54216     | NM 018764.2    | protocadherin 7                                                    | 21.5416  | 14.2519 | 1.5115 |
| 16362     | NM 001159396.1 | interferon regulatory factor 1                                     | 16.5818  | 10.9424 | 1.5154 |
| 18933     | NM 001025570.1 | paired related homeobox 1                                          | 10.5276  | 6.9171  | 1.5220 |
| 268515    | NM 198423.3    | BAH domain and coiled-coil containing 1                            | 4.7554   | 3.1148  | 1.5267 |
| 71409     | NM 172409.2    | formin-like 2                                                      | 8.1921   | 5.3624  | 1.5277 |
| 110521    | NM 007772.2    | human immunodeficiency virus type I enhancer binding protein 1     | 3.0667   | 1.9942  | 1.5379 |
| 52552     | NM 001081009.1 | poly (ADP-ribose) polymerase family, member 8                      | 13.5426  | 8.7941  | 1.5400 |
| 18481     | NM 008778.2    | p21 protein (Cdc42/Rac)-activated kinase 3                         | 7.0763   | 4.5827  | 1.5441 |
| 170737    | NM 133206.3    | zinc and ring finger 1                                             | 6.7605   | 4.3767  | 1.5447 |
| 16362     | NM 008390.2    | interferon regulatory factor 1                                     | 17.1987  | 11.0824 | 1.5519 |
| 102626    | NM 178907.3    | mitogen-activated protein kinase-activated protein kinase 3        | 9.9259   | 6.3906  | 1.5532 |
| 99382     | NM 178890.3    | ankyrin repeat and BTB (POZ) domain containing 2                   | 5.5385   | 3.5475  | 1.5612 |
| 433022    | NM 001134480.1 | phosphatidylinositol-specific phospholipase C, X domain containing | 2.1635   | 1.3833  | 1.5640 |
| 98376     | NM 178883.5    | golgin, RAB6-interacting                                           | 10.4566  | 6.6407  | 1.5746 |
| 100463512 | NM 001190732.1 | -                                                                  | 113.7580 | 72.2355 | 1.5748 |
| 18933     | NM 175686.3    | paired related homeobox 1                                          | 22.8892  | 14.5037 | 1.5782 |
| 52118     | NM 027514.2    | poliovirus receptor                                                | 18.4506  | 11.6816 | 1.5795 |
| 21356     | NM 001025313.1 | TAP binding protein                                                | 24.8124  | 15.6451 | 1.5859 |
| 12608     | NM 009883.3    | CCAAT/enhancer binding protein (C/EBP), beta                       | 30.1458  | 19.0011 | 1.5865 |
| 21356     | NM 009318.2    | TAP binding protein                                                | 24.8915  | 15.6753 | 1.5879 |
| 18933     | NM 011127.2    | paired related homeobox 1                                          | 22.7663  | 14.3271 | 1.5890 |
| 14538     | NM 133219.1    | glucosaminyl (N-acetyl) transferase 2, I-branching enzyme          | 3.2357   | 2.0359  | 1.5893 |
| 67338     | NM 001164569.1 | ring finger and FYVE like domain containing protein                | 10.5859  | 6.6496  | 1.5920 |
| 170737    | NM 001168622.1 | zinc and ring finger 1                                             | 6.1730   | 3.8729  | 1.5939 |
| 16177     | NM 008362.2    | interleukin 1 receptor, type I                                     | 2.8510   | 1.7883  | 1.5942 |
| 12837     | NM 007739.2    | collagen, type VIII, alpha 1                                       | 32.0221  | 20.0786 | 1.5948 |
| 67338     | NM 001164570.1 | ring finger and FYVE like domain containing protein                | 10.7568  | 6.7268  | 1.5991 |
| 67338     | NM 001007465.3 | ring finger and FYVE like domain containing protein                | 11.0411  | 6.9021  | 1.5997 |
| 16177     | NM 001123382.1 | interleukin 1 receptor, type I                                     | 2.8175   | 1.7552  | 1.6053 |

|           |                |                                                                    |          |          |        |
|-----------|----------------|--------------------------------------------------------------------|----------|----------|--------|
| 67338     | NM 026097.3    | ring finger and FYVE like domain containing protein                | 10.6633  | 6.6350   | 1.6071 |
| 12192     | NM 007564.5    | zinc finger protein 36, C3H type-like 1                            | 13.5355  | 8.4117   | 1.6091 |
| 20620     | NM 152804.2    | polo-like kinase 2 (Drosophila)                                    | 226.8847 | 140.7800 | 1.6116 |
| 67338     | NM 001164571.1 | ring finger and FYVE like domain containing protein                | 10.9996  | 6.8126   | 1.6146 |
| 15980     | NM 008338.3    | interferon gamma receptor 2                                        | 48.4175  | 29.8441  | 1.6223 |
| 18033     | NM 008689.2    | nuclear factor of kappa light polypeptide gene enhancer in B-cell  | 34.4185  | 21.1595  | 1.6266 |
| 58244     | NM 021433.3    | syntaxin 6                                                         | 21.9780  | 13.5074  | 1.6271 |
| 231549    | NM 178701.3    | leucine rich repeat containing 8D                                  | 12.1910  | 7.4796   | 1.6299 |
| 231549    | NM 001122768.1 | leucine rich repeat containing 8D                                  | 12.1168  | 7.4340   | 1.6299 |
| 75234     | NM 029219.1    | ring finger protein 19B                                            | 20.7091  | 12.7049  | 1.6300 |
| 74194     | NM 028810.2    | Rho family GTPase 3                                                | 29.4216  | 17.9490  | 1.6392 |
| 192657    | NM 138953.2    | elongation factor RNA polymerase II 2                              | 22.6277  | 13.6865  | 1.6533 |
| 22031     | NM 001048206.1 | TNF receptor-associated factor 3                                   | 10.4963  | 6.3396   | 1.6557 |
| 20352     | NM 013659.4    | sema domain, immunoglobulin domain (Ig), transmembrane domain (TM) | 6.6758   | 4.0122   | 1.6639 |
| 14573     | NM 010275.2    | glial cell line derived neurotrophic factor                        | 5.8571   | 3.5149   | 1.6663 |
| 22031     | NM 011632.2    | TNF receptor-associated factor 3                                   | 10.5627  | 6.3387   | 1.6664 |
| 16362     | NM 001159393.1 | interferon regulatory factor 1                                     | 10.8842  | 6.5247   | 1.6682 |
| 236285    | NM 173414.3    | LanC lantibiotic synthetase component C-like 3 (bacterial)         | 6.3554   | 3.8088   | 1.6686 |
| 75296     | NM 201230.4    | Fgfr1 oncogene partner                                             | 13.8136  | 8.2592   | 1.6725 |
| 114774    | NM 054056.2    | PRKC, apoptosis, WT1, regulator                                    | 17.2460  | 10.2983  | 1.6746 |
| 19288     | NM 008987.3    | pentraxin related gene                                             | 48.8220  | 29.0910  | 1.6783 |
| 320924    | NM 178793.4    | collagen and calcium binding EGF domains 1                         | 11.1861  | 6.6199   | 1.6898 |
| 16155     | NM 008349.5    | interleukin 10 receptor, beta                                      | 17.5100  | 10.3314  | 1.6948 |
| 19225     | NM 011198.3    | prostaglandin-endoperoxide synthase 2                              | 27.0702  | 15.9376  | 1.6985 |
| 19734     | NM 011267.3    | regulator of G-protein signaling 16                                | 7.4345   | 4.3718   | 1.7005 |
| 75599     | NM 029357.3    | protocadherin 1                                                    | 3.0870   | 1.8115   | 1.7041 |
| 387609    | NM 199449.2    | zinc fingers and homeoboxes 2                                      | 3.1821   | 1.8640   | 1.7072 |
| 672511    | XM 001476651.2 | ring finger protein 213                                            | 5.8450   | 3.4128   | 1.7127 |
| 672511    | XM 001477846.2 | ring finger protein 213                                            | 5.8450   | 3.4128   | 1.7127 |
| 100504142 | XR 106553.1    | predicted gene, 20084                                              | 240.3367 | 140.3107 | 1.7129 |

|           |                |                                                                   |          |          |        |
|-----------|----------------|-------------------------------------------------------------------|----------|----------|--------|
| 100504142 | XR 105374.1    | predicted gene, 20084                                             | 240.3367 | 140.3107 | 1.7129 |
| 380855    | NM 001013769.1 | regulator of sex limited protein 1                                | 4.7169   | 2.7497   | 1.7154 |
| 260315    | NM 001081035.1 | neuron navigator 3                                                | 0.9002   | 0.5237   | 1.7191 |
| 100504290 | XR 105381.1    | predicted gene, 20152                                             | 21.0056  | 12.0925  | 1.7371 |
| 100504290 | XR 106558.1    | predicted gene, 20152                                             | 21.1812  | 12.1505  | 1.7432 |
| 100125931 | NR 030676.1    | RIKEN cDNA A130049A11 gene                                        | 3.6301   | 2.0793   | 1.7458 |
| 72747     | NM 028341.4    | tetratricopeptide repeat domain 39C                               | 7.9645   | 4.5361   | 1.7558 |
| 15273     | NM 010437.2    | human immunodeficiency virus type I enhancer binding protein 2    | 5.4886   | 3.1134   | 1.7629 |
| 408065    | NM 001001186.3 | zinc finger protein 456                                           | 1.9103   | 1.0698   | 1.7856 |
| 229675    | NM 172684.2    | rosbin, round spermatid basic protein 1                           | 5.7704   | 3.1845   | 1.8120 |
| 20308     | NM 011338.2    | chemokine (C-C motif) ligand 9                                    | 17.2538  | 9.4835   | 1.8193 |
| 26399     | NM 011943.2    | mitogen-activated protein kinase kinase 6                         | 7.2214   | 3.9488   | 1.8287 |
| 53970     | NM 017395.2    | regulatory factor X, 5 (influences HLA class II expression)       | 2.0734   | 1.1278   | 1.8385 |
| 16477     | NM 008416.2    | Jun-B oncogene                                                    | 10.6419  | 5.7279   | 1.8579 |
| 319622    | NM 001033380.3 | inositol 1,4,5-triphosphate receptor interacting protein-like 2   | 44.3796  | 23.7390  | 1.8695 |
| 73683     | NM 001111111.1 | autophagy related 16 like 2 (S. cerevisiae)                       | 2.2595   | 1.2060   | 1.8736 |
| 231830    | NM 174850.3    | MICAL-like 2                                                      | 28.4579  | 15.1649  | 1.8766 |
| 20656     | NM 013671.3    | superoxide dismutase 2, mitochondrial                             | 28.3965  | 15.0895  | 1.8819 |
| 13874     | NM 007950.2    | epiregulin                                                        | 17.2754  | 9.1729   | 1.8833 |
| 108767    | NM 001033225.2 | proline-rich nuclear receptor coactivator 1                       | 9.7834   | 5.1865   | 1.8863 |
| 223881    | NM 172612.3    | Rho family GTPase 1                                               | 63.4554  | 33.5264  | 1.8927 |
| 75985     | NM 029494.2    | RAB30, member RAS oncogene family                                 | 7.7293   | 4.0790   | 1.8949 |
| 671535    | NM 001163576.1 | poly (ADP-ribose) polymerase family, member 10                    | 5.1870   | 2.7172   | 1.9090 |
| 18174     | NM 008732.2    | solute carrier family 11 (proton-coupled divalent metal ion trans | 28.1269  | 14.7291  | 1.9096 |
| 671535    | NM 001163575.1 | poly (ADP-ribose) polymerase family, member 10                    | 5.3393   | 2.7918   | 1.9125 |
| 64292     | NM 022415.3    | prostaglandin E synthase                                          | 6.7331   | 3.4511   | 1.9510 |
| 67844     | NM 026405.3    | RAB32, member RAS oncogene family                                 | 67.8149  | 34.7469  | 1.9517 |
| 12125     | NM 009754.3    | BCL2-like 11 (apoptosis facilitator)                              | 4.2829   | 2.1795   | 1.9651 |
| 100503984 | XR 104558.1    | -                                                                 | 24.2867  | 12.2887  | 1.9763 |
| 100503984 | XR 104553.1    | -                                                                 | 25.6072  | 12.9568  | 1.9763 |

|           |                |                                                                   |         |         |        |
|-----------|----------------|-------------------------------------------------------------------|---------|---------|--------|
| 100503984 | XR 104554.1    | -                                                                 | 24.1888 | 12.2392 | 1.9763 |
| 100503984 | XR 104561.1    | -                                                                 | 25.5255 | 12.9155 | 1.9763 |
| 100503984 | XR 104562.1    | -                                                                 | 27.3260 | 13.8265 | 1.9763 |
| 100503984 | XR 104560.1    | -                                                                 | 24.7879 | 12.5423 | 1.9763 |
| 100503984 | XR 104557.1    | -                                                                 | 25.0726 | 12.6863 | 1.9763 |
| 100503984 | XR 104555.1    | -                                                                 | 24.7369 | 12.5165 | 1.9763 |
| 100503984 | XR 104563.1    | -                                                                 | 28.2008 | 14.2479 | 1.9793 |
| 100503984 | XR 104559.1    | -                                                                 | 24.3228 | 12.2887 | 1.9793 |
| 100503984 | XR 104556.1    | -                                                                 | 24.0312 | 12.1414 | 1.9793 |
| 230073    | NM 172689.3    | DEAD (Asp-Glu-Ala-Asp) box polypeptide 58                         | 1.7282  | 0.8609  | 2.0074 |
| 12125     | NM 207681.2    | BCL2-like 11 (apoptosis facilitator)                              | 4.3432  | 2.1615  | 2.0094 |
| 74732     | NM 001163590.1 | syntaxin 11                                                       | 3.1775  | 1.5791  | 2.0123 |
| 270118    | NM 001013813.3 | mastermind like 2 (Drosophila)                                    | 2.6256  | 1.2998  | 2.0200 |
| 74732     | NM 001163591.1 | syntaxin 11                                                       | 3.3312  | 1.6469  | 2.0227 |
| 319909    | NM 001126490.1 | isthmin 1 homolog (zebrafish)                                     | 1.1413  | 0.5635  | 2.0253 |
| 12125     | NM 207680.2    | BCL2-like 11 (apoptosis facilitator)                              | 4.2339  | 2.0894  | 2.0264 |
| 212168    | NM 172503.3    | zinc finger, SWIM domain containing 4                             | 4.6611  | 2.2975  | 2.0287 |
| 108797    | NM 175366.3    | mex3 homolog B (C. elegans)                                       | 6.2886  | 3.0933  | 2.0330 |
| 70701     | NM 001081205.1 | NIPA-like domain containing 1                                     | 0.9605  | 0.4717  | 2.0363 |
| 17082     | NM 001025602.2 | interleukin 1 receptor-like 1                                     | 31.0010 | 15.1780 | 2.0425 |
| 67916     | NM 080555.2    | phosphatidic acid phosphatase type 2B                             | 17.1256 | 8.3487  | 2.0513 |
| 74732     | NM 029075.1    | syntaxin 11                                                       | 3.1328  | 1.5202  | 2.0607 |
| 100503392 | XR 107188.1    | -                                                                 | 3.8623  | 1.8678  | 2.0679 |
| 100503392 | XR 105978.1    | -                                                                 | 3.8623  | 1.8678  | 2.0679 |
| 22038     | NM 011636.2    | phospholipid scramblase 1                                         | 44.7919 | 21.5776 | 2.0758 |
| 100502974 | XR 107727.1    | predicted gene, 19481                                             | 4.4408  | 2.1310  | 2.0839 |
| 18174     | NM 001146161.1 | solute carrier family 11 (proton-coupled divalent metal ion trans | 32.4984 | 15.5207 | 2.0939 |
| 16878     | NM 001039537.1 | leukemia inhibitory factor                                        | 6.5125  | 3.0480  | 2.1366 |
| 17082     | NM 010743.2    | interleukin 1 receptor-like 1                                     | 53.3054 | 24.9395 | 2.1374 |
| 16878     | NM 008501.2    | leukemia inhibitory factor                                        | 6.2228  | 2.9103  | 2.1382 |

|           |                |                                                         |         |         |        |
|-----------|----------------|---------------------------------------------------------|---------|---------|--------|
| 100503392 | XR 107187.1    | -                                                       | 4.1181  | 1.9161  | 2.1492 |
| 100503392 | XR 105977.1    | -                                                       | 4.1181  | 1.9161  | 2.1492 |
| 57875     | NM 020581.2    | angiopoietin-like 4                                     | 1.9028  | 0.8847  | 2.1509 |
| 100503984 | XR 104572.1    | -                                                       | 3.1527  | 1.4563  | 2.1648 |
| 100503984 | XR 104565.1    | -                                                       | 3.1695  | 1.4641  | 2.1648 |
| 192656    | NM 138952.3    | receptor (TNFRSF)-interacting serine-threonine kinase 2 | 45.2043 | 20.8356 | 2.1696 |
| 209086    | NM 010156.3    | sterile alpha motif domain containing 9-like            | 14.2532 | 6.5460  | 2.1774 |
| 100503984 | XR 104570.1    | -                                                       | 12.4206 | 5.6963  | 2.1805 |
| 100503984 | XR 104569.1    | -                                                       | 12.3266 | 5.6532  | 2.1805 |
| 100503984 | XR 104567.1    | -                                                       | 11.8513 | 5.3866  | 2.2001 |
| 11796     | NM 007464.3    | baculoviral IAP repeat-containing 3                     | 3.6884  | 1.6753  | 2.2016 |
| 100503984 | XR 104568.1    | -                                                       | 12.2280 | 5.5361  | 2.2088 |
| 100503984 | XR 104566.1    | -                                                       | 12.1348 | 5.4939  | 2.2088 |
| 326623    | NM 177371.3    | tumor necrosis factor (ligand) superfamily, member 15   | 0.7176  | 0.3218  | 2.2300 |
| 270118    | NM 173776.3    | mastermind like 2 (Drosophila)                          | 3.0188  | 1.3528  | 2.2315 |
| 50908     | NM 001097617.1 | complement component 1, s subcomponent                  | 1.7196  | 0.7684  | 2.2380 |
| 239650    | NM 177716.3    | expressed sequence AI836003                             | 2.8046  | 1.2457  | 2.2514 |
| 50908     | NM 144938.2    | complement component 1, s subcomponent                  | 1.6859  | 0.7465  | 2.2584 |
| 15937     | NM 133662.2    | immediate early response 3                              | 34.3661 | 15.1534 | 2.2679 |
| 100503551 | XR 107722.1    | predicted gene 15817                                    | 2.1234  | 0.9284  | 2.2872 |
| 100503551 | XR 106291.1    | predicted gene 15817                                    | 2.1234  | 0.9284  | 2.2872 |
| 70737     | NM 001037711.2 | cingulin                                                | 1.3052  | 0.5654  | 2.3084 |
| 16206     | NM 008377.2    | leucine-rich repeats and immunoglobulin-like domains 1  | 25.1269 | 10.8787 | 2.3097 |
| 170677    | NM 130878.2    | cadherin-related family member 1                        | 0.4505  | 0.1901  | 2.3701 |
| 20312     | NM 009142.3    | chemokine (C-X3-C motif) ligand 1                       | 0.7390  | 0.3097  | 2.3860 |
| 319236    | NM 001146007.1 | tripartite motif-containing 12C                         | 0.5071  | 0.2124  | 2.3877 |
| 12521     | NM 001136055.1 | CD82 antigen                                            | 2.6123  | 1.0928  | 2.3903 |
| 12521     | NM 007656.4    | CD82 antigen                                            | 2.4983  | 1.0321  | 2.4206 |
| 20821     | NM 001082552.1 | tripartite motif-containing 21                          | 1.5322  | 0.6264  | 2.4462 |
| 215113    | NM 173388.1    | solute carrier family 43, member 2                      | 2.7445  | 1.1175  | 2.4559 |

|           |                |                                                                   |         |         |        |
|-----------|----------------|-------------------------------------------------------------------|---------|---------|--------|
| 18034     | NM 019408.3    | nuclear factor of kappa light polypeptide gene enhancer in B-cell | 58.9402 | 23.9000 | 2.4661 |
| 18034     | NM 001177370.1 | nuclear factor of kappa light polypeptide gene enhancer in B-cell | 62.8664 | 25.4739 | 2.4679 |
| 12609     | NM 007679.4    | CCAAT/enhancer binding protein (C/EBP), delta                     | 4.0962  | 1.6596  | 2.4683 |
| 20821     | NM 009277.3    | tripartite motif-containing 21                                    | 1.5457  | 0.6238  | 2.4778 |
| 18034     | NM 001177369.1 | nuclear factor of kappa light polypeptide gene enhancer in B-cell | 62.2524 | 25.1053 | 2.4797 |
| 230738    | NM 153159.2    | zinc finger CCCH type containing 12A                              | 15.0109 | 6.0299  | 2.4894 |
| 71683     | NM 001048207.1 | glycophorin C                                                     | 15.8227 | 6.3333  | 2.4983 |
| 21929     | NM 001166402.1 | tumor necrosis factor, alpha-induced protein 3                    | 13.3463 | 5.3201  | 2.5087 |
| 21929     | NM 009397.3    | tumor necrosis factor, alpha-induced protein 3                    | 13.1228 | 5.2182  | 2.5148 |
| 100048759 | XM 003086792.1 | -                                                                 | 5.9885  | 2.3270  | 2.5735 |
| 434438    | NM 001135198.1 | coiled-coil domain containing 36                                  | 0.5216  | 0.2005  | 2.6017 |
| 12266     | NM 009778.2    | complement component 3                                            | 5.8334  | 2.2281  | 2.6180 |
| 18812     | NM 011118.2    | prolactin family 2, subfamily c, member 3                         | 33.4373 | 12.7137 | 2.6300 |
| 17533     | NM 008625.2    | mannose receptor, C type 1                                        | 1.5246  | 0.5760  | 2.6469 |
| 107849    | NM 181852.1    | prolactin family 2, subfamily c, member 5                         | 14.0089 | 5.2485  | 2.6691 |
| 20568     | NM 011414.3    | secretory leukocyte peptidase inhibitor                           | 4.1181  | 1.5329  | 2.6864 |
| 18811     | NM 031191.1    | prolactin family 2, subfamily c, member 2                         | 36.9197 | 13.7408 | 2.6869 |
| 19260     | NM 008979.1    | protein tyrosine phosphatase, non-receptor type 22 (lymphoid)     | 2.8108  | 1.0421  | 2.6973 |
| 71816     | NM 027934.2    | ring finger protein 180                                           | 0.4627  | 0.1715  | 2.6980 |
| 80859     | NM 001159395.1 | nuclear factor of kappa light polypeptide gene enhancer in B-cell | 6.1356  | 2.2726  | 2.6998 |
| 80859     | NM 030612.3    | nuclear factor of kappa light polypeptide gene enhancer in B-cell | 5.6188  | 2.0768  | 2.7055 |
| 18208     | NM 008744.2    | netrin 1                                                          | 4.8428  | 1.7853  | 2.7125 |
| 80859     | NM 001159394.1 | nuclear factor of kappa light polypeptide gene enhancer in B-cell | 5.8570  | 2.1589  | 2.7130 |
| 666317    | NM 001045532.1 | Prolactin family 2, subfamily c, member 1                         | 5.0628  | 1.8389  | 2.7531 |
| 57783     | NM 021327.2    | TNFAIP3 interacting protein 1                                     | 30.0159 | 10.7610 | 2.7893 |
| 545551    | NR 033629.1    | cDNA sequence BC021767                                            | 1.0428  | 0.3723  | 2.8010 |
| 630663    | XM 904245.4    | predicted gene 7040                                               | 9.9369  | 3.4792  | 2.8561 |
| 11988     | NM 007514.3    | solute carrier family 7 (cationic amino acid transporter, y+ syst | 0.2404  | 0.0840  | 2.8632 |
| 11988     | NM 001044740.1 | solute carrier family 7 (cationic amino acid transporter, y+ syst | 0.2411  | 0.0842  | 2.8632 |
| 20556     | NM 011408.1    | schlafen 2                                                        | 2.7381  | 0.9423  | 2.9058 |

|           |                |                                                                   |          |          |        |
|-----------|----------------|-------------------------------------------------------------------|----------|----------|--------|
| 16997     | NM 013589.3    | latent transforming growth factor beta binding protein 2          | 0.2106   | 0.0708   | 2.9733 |
| 630663    | XM 001473551.2 | predicted gene 7040                                               | 13.9888  | 4.6690   | 2.9961 |
| 16149     | NM 001042605.1 | CD74 antigen (invariant polypeptide of major histocompatibility c | 1.3238   | 0.4284   | 3.0899 |
| 16149     | NM 010545.3    | CD74 antigen (invariant polypeptide of major histocompatibility c | 1.4713   | 0.4657   | 3.1592 |
| 19698     | NM 009046.2    | avian reticuloendotheliosis viral (v-rel) oncogene related B      | 14.9871  | 4.7315   | 3.1675 |
| 233552    | NM 201352.2    | glycerophosphodiester phosphodiesterase domain containing 5       | 1.9709   | 0.6096   | 3.2333 |
| 12051     | NM 033601.3    | B-cell leukemia/lymphoma 3                                        | 3.6036   | 1.0416   | 3.4595 |
| 21822     | NM 011579.3    | T-cell specific GTPase 1                                          | 0.3563   | 0.1027   | 3.4689 |
| 14239     | NM 010226.2    | forkhead box S1                                                   | 0.9542   | 0.2751   | 3.4689 |
| 20306     | NM 013654.3    | chemokine (C-C motif) ligand 7                                    | 342.8538 | 98.8195  | 3.4695 |
| 56489     | NM 019777.3    | inhibitor of kappaB kinase epsilon                                | 6.0930   | 1.7114   | 3.5602 |
| 20296     | NM 011333.3    | chemokine (C-C motif) ligand 2                                    | #####    | 433.7946 | 3.7885 |
| 100039796 | NM 001145164.1 | T-cell specific GTPase 2                                          | 0.3427   | 0.0896   | 3.8229 |
| 21942     | NM 001077508.1 | tumor necrosis factor receptor superfamily, member 9              | 0.6437   | 0.1624   | 3.9645 |
| 14102     | NM 007987.2    | Fas (TNF receptor superfamily member 6)                           | 9.7176   | 2.4512   | 3.9645 |
| 626578    | NM 001039646.2 | guanylate-binding protein 10                                      | 0.3242   | 0.0818   | 3.9645 |
| 18035     | NM 010907.2    | nuclear factor of kappa light polypeptide gene enhancer in B-cell | 66.4125  | 16.4009  | 4.0493 |
| 16193     | NM 031168.1    | interleukin 6                                                     | 4.9981   | 1.2276   | 4.0716 |
| 18606     | NM 001136077.1 | ectonucleotide pyrophosphatase/phosphodiesterase 2                | 0.9115   | 0.2233   | 4.0811 |
| 56619     | NM 019948.2    | C-type lectin domain family 4, member e                           | 0.7095   | 0.1718   | 4.1296 |
| 320207    | NM 177320.2    | phosphoinositide-3-kinase, regulatory subunit 5, p101             | 1.8842   | 0.4464   | 4.2214 |
| 21942     | NM 011612.2    | tumor necrosis factor receptor superfamily, member 9              | 0.6532   | 0.1521   | 4.2948 |
| 238393    | NM 001033335.3 | serine (or cysteine) peptidase inhibitor, clade A, member 3F      | 0.4199   | 0.0978   | 4.2948 |
| 18606     | NM 015744.2    | ectonucleotide pyrophosphatase/phosphodiesterase 2                | 1.0805   | 0.2447   | 4.4150 |
| 102502    | NM 001033210.3 | plastin 1 (I-isoform)                                             | 0.6961   | 0.1561   | 4.4600 |
| 238393    | NM 001168294.1 | serine (or cysteine) peptidase inhibitor, clade A, member 3F      | 0.4282   | 0.0960   | 4.4600 |
| 238393    | NM 001168295.1 | serine (or cysteine) peptidase inhibitor, clade A, member 3F      | 0.4726   | 0.1060   | 4.4600 |
| 100702    | NM 194336.2    | guanylate binding protein 6                                       | 0.4128   | 0.0916   | 4.5051 |
| 14102     | NM 001146708.1 | Fas (TNF receptor superfamily member 6)                           | 3.5421   | 0.7798   | 4.5426 |
| 18788     | NM 011111.4    | serine (or cysteine) peptidase inhibitor, clade B, member 2       | 1.0686   | 0.2336   | 4.5744 |

|           |                |                                                                   |          |         |         |
|-----------|----------------|-------------------------------------------------------------------|----------|---------|---------|
| 21942     | NM 001077509.1 | tumor necrosis factor receptor superfamily, member 9              | 0.7267   | 0.1535  | 4.7353  |
| 12363     | NM 007609.2    | caspase 4, apoptosis-related cysteine peptidase                   | 12.0475  | 2.5167  | 4.7871  |
| 18788     | NM 001174170.1 | serine (or cysteine) peptidase inhibitor, clade B, member 2       | 1.0608   | 0.2177  | 4.8730  |
| 214854    | NM 153408.2    | neutralized homolog 3 homolog (Drosophila)                        | 7.3203   | 1.4660  | 4.9933  |
| 14468     | NM 010259.2    | guanylate binding protein 1                                       | 0.2915   | 0.0512  | 5.6989  |
| 547253    | NM 001039530.3 | poly (ADP-ribose) polymerase family, member 14                    | 0.1528   | 0.0249  | 6.1449  |
| 18037     | NM 008690.3    | nuclear factor of kappa light polypeptide gene enhancer in B-cell | 6.8181   | 1.1019  | 6.1878  |
| 17384     | NM 019471.2    | matrix metallopeptidase 10                                        | 1.4331   | 0.2305  | 6.2170  |
| 14469     | NM 010260.1    | guanylate binding protein 2                                       | 1.6490   | 0.2627  | 6.2771  |
| 22029     | NM 009421.3    | TNF receptor-associated factor 1                                  | 10.6692  | 1.6442  | 6.4890  |
| 630294    | NM 001177467.1 | predicted gene 7030                                               | 0.7952   | 0.1203  | 6.6074  |
| 240675    | NM 172840.2    | von Willebrand factor A domain containing 2                       | 0.1288   | 0.0186  | 6.9378  |
| 100503422 | XM 003085129.1 | predicted gene, 19684                                             | 0.4659   | 0.0672  | 6.9378  |
| 100503422 | XM 003085162.1 | predicted gene, 19684                                             | 0.4665   | 0.0672  | 6.9378  |
| 547347    | NM 001034909.3 | predicted gene 6034                                               | 0.3064   | 0.0442  | 6.9378  |
| 17392     | NM 010809.1    | matrix metallopeptidase 3                                         | 0.3270   | 0.0388  | 8.4245  |
| 17386     | NM 008607.2    | matrix metallopeptidase 13                                        | 1.1358   | 0.1348  | 8.4245  |
| 20715     | NM 009251.1    | serine (or cysteine) peptidase inhibitor, clade A, member 3G      | 2.0601   | 0.2310  | 8.9200  |
| 16819     | NM 008491.1    | lipocalin 2                                                       | 18.0602  | 1.9871  | 9.0887  |
| 216799    | NM 145827.3    | NLR family, pyrin domain containing 3                             | 0.1689   | 0.0179  | 9.4156  |
| 17395     | NM 013599.2    | matrix metallopeptidase 9                                         | 0.1347   | 0.0113  | 11.8934 |
| 414084    | NM 001001495.2 | TNFAIP3 interacting protein 3                                     | 3.2149   | 0.2488  | 12.9226 |
| 15945     | NM 021274.1    | chemokine (C-X-C motif) ligand 10                                 | 5.3800   | 0.4071  | 13.2149 |
| 20311     | NM 009141.2    | chemokine (C-X-C motif) ligand 5                                  | 337.7799 | 24.9941 | 13.5144 |
| 22329     | NM 011693.3    | vascular cell adhesion molecule 1                                 | 21.2693  | 1.3054  | 16.2930 |
| 14825     | NM 008176.3    | chemokine (C-X-C motif) ligand 1                                  | 319.9473 | 18.5556 | 17.2426 |
| 12981     | NM 009969.4    | colony stimulating factor 2 (granulocyte-macrophage)              | 0.6228   | 0.0349  | 17.8401 |
| 408066    | XR 001629.2    | cDNA sequence BC067074                                            | 0.1007   | 0.0044  | 22.7956 |
| 16165     | NM 008356.3    | interleukin 13 receptor, alpha 2                                  | 0.5735   | 0.0231  | 24.7779 |
| 20297     | NM 016960.2    | chemokine (C-C motif) ligand 20                                   | 56.3419  | 1.6931  | 33.2767 |



|           |                |                                                                   |         |        |         |
|-----------|----------------|-------------------------------------------------------------------|---------|--------|---------|
| 20210     | NM 011315.3    | serum amyloid A 3                                                 | 4.6446  | 0.1358 | 34.1934 |
| 20297     | NM 001159738.1 | chemokine (C-C motif) ligand 20                                   | 55.8253 | 1.6142 | 34.5847 |
| 71132     | NM 001042418.1 | calcium-binding tyrosine-(Y)-phosphorylation regulated (fibroushe | 0.1741  | 0.0000 | Inf     |
| 14728     | NM 013532.2    | leukocyte immunoglobulin-like receptor, subfamily B, member 4     | 0.2769  | 0.0000 | Inf     |
| 20310     | NM 009140.2    | chemokine (C-X-C motif) ligand 2                                  | 0.4951  | 0.0000 | Inf     |
| 13982     | NM 007956.4    | estrogen receptor 1 (alpha)                                       | 0.0662  | 0.0000 | Inf     |
| 18126     | NM 010927.3    | nitric oxide synthase 2, inducible                                | 1.2452  | 0.0000 | Inf     |
| 16365     | NM 008392.1    | immunoresponsive gene 1                                           | 0.1381  | 0.0000 | Inf     |
| 15894     | NM 010493.2    | intercellular adhesion molecule 1                                 | 0.1407  | 0.0000 | Inf     |
| 408066    | XR 035217.2    | cDNA sequence BC067074                                            | 0.0759  | 0.0000 | Inf     |
| 100503281 | XR 108224.1    | -                                                                 | 0.4655  | 0.0000 | Inf     |

Supplementary Table 3 Differential expressed genes of MLL1-/- MEF cell with or without TNF $\alpha$ 

| ID        | ACCESSION NUMBER | NAME                                                                    | TNF    | Ctrl   | FOLDCHANGE |
|-----------|------------------|-------------------------------------------------------------------------|--------|--------|------------|
| 12695     | NM_001005787.1   | InaD-like (Drosophila)                                                  | 0.0000 | 0.1546 | 0.0000     |
| 100045736 | XM_001474842.2   | -                                                                       | 0.0722 | 1.2501 | 0.0578     |
| 100039589 | XM_003084688.1   | predicted gene 2329                                                     | 0.0722 | 1.1112 | 0.0650     |
| 380698    | NM_199152.2      | obscurin, cytoskeletal calmodulin and titin-interacting RhoGEF          | 0.0023 | 0.0260 | 0.0867     |
| 245607    | NM_001163016.1   | G protein-coupled receptor associated sorting protein 2                 | 0.0274 | 0.2769 | 0.0991     |
| 245607    | NM_001163017.1   | G protein-coupled receptor associated sorting protein 2                 | 0.0275 | 0.2780 | 0.0991     |
| 245607    | NM_001163015.1   | G protein-coupled receptor associated sorting protein 2                 | 0.0272 | 0.2742 | 0.0991     |
| 100503347 | XM_003086491.1   | predicted gene, 19648                                                   | 0.0400 | 0.2308 | 0.1734     |
| 19784     | NR_004439.1      | ribonuclease P RNA-like 2                                               | 0.2223 | 1.2111 | 0.1836     |
| 24131     | NM_011918.4      | LIM domain binding 3                                                    | 0.2466 | 0.6916 | 0.3566     |
| 24131     | NM_001039072.2   | LIM domain binding 3                                                    | 0.2533 | 0.7001 | 0.3618     |
| 24131     | NM_001039071.2   | LIM domain binding 3                                                    | 0.2561 | 0.7079 | 0.3618     |
| 24131     | NM_001039074.2   | LIM domain binding 3                                                    | 0.2509 | 0.6936 | 0.3618     |
| 24131     | NM_001039073.2   | LIM domain binding 3                                                    | 0.2624 | 0.7148 | 0.3671     |
| 19017     | NR_027710.1      | peroxisome proliferative activated receptor, gamma, coactivator 1 alpha | 0.1675 | 0.4523 | 0.3702     |
| 19017     | NM_008904.2      | peroxisome proliferative activated receptor, gamma, coactivator 1 alpha | 0.1683 | 0.4545 | 0.3702     |
| 11754     | NM_009675.2      | amine oxidase, copper containing 3                                      | 0.2003 | 0.5324 | 0.3762     |
| 100047224 | XM_003086950.1   | -                                                                       | 1.6493 | 4.3521 | 0.3790     |
| 195727    | NM_001081052.1   | Nance-Horan syndrome (human)                                            | 0.3465 | 0.7773 | 0.4458     |
| 223650    | NM_144848.2      | epiplakin 1                                                             | 0.2347 | 0.5250 | 0.4471     |
| 668066    | XM_001004338.2   | predicted gene 14418                                                    | 1.5995 | 3.4546 | 0.4630     |
| 243385    | NM_183183.2      | GPRIN family member 3                                                   | 1.6040 | 3.3894 | 0.4732     |
| 244867    | NM_175535.3      | Rho GTPase activating protein 20                                        | 1.5055 | 3.0903 | 0.4872     |
| 625703    | XM_904090.4      | -                                                                       | 1.7629 | 3.5234 | 0.5003     |
| 13838     | NM_007936.3      | Eph receptor A4                                                         | 1.0641 | 2.1247 | 0.5008     |

|           |                |                                                                |           |           |        |
|-----------|----------------|----------------------------------------------------------------|-----------|-----------|--------|
| 231861    | NM_178242.2    | trinucleotide repeat containing 18                             | 3.0532    | 6.0066    | 0.5083 |
| 242481    | NM_172868.2    | paralemmin 2                                                   | 1.5201    | 2.9836    | 0.5095 |
| 240427    | NM_053099.2    | SET binding protein 1                                          | 0.7680    | 1.4917    | 0.5149 |
| 66395     | NM_009643.1    | AHNAK nucleoprotein (desmoyokin)                               | 96.8238   | 183.5819  | 0.5274 |
| 67393     | NM_133687.2    | CXXC finger 5                                                  | 2.4654    | 4.5681    | 0.5397 |
| 330938    | NM_178118.2    | DIX domain containing 1                                        | 6.9659    | 12.5231   | 0.5562 |
| 100503159 | XR_108047.1    | -                                                              | 6.5701    | 11.6379   | 0.5645 |
| 26408     | NM_008580.4    | mitogen-activated protein kinase kinase kinase 5               | 1.8536    | 3.2225    | 0.5752 |
| 231861    | NM_001122730.1 | trinucleotide repeat containing 18                             | 3.9304    | 6.6259    | 0.5932 |
| 17309     | NM_010795.3    | mannoside acetylglucosaminyltransferase 3                      | 5.4516    | 9.0626    | 0.6016 |
| 100042862 | XM_003085879.1 | predicted gene 4076                                            | 234.2826  | 388.2562  | 0.6034 |
| 100042862 | XM_001478943.2 | predicted gene 4076                                            | 246.8104  | 408.8011  | 0.6037 |
| 11630     | NM_172393.2    | absent in melanoma 1                                           | 11.4334   | 18.8011   | 0.6081 |
| 214137    | NM_172525.2    | Rho GTPase activating protein 29                               | 6.1049    | 9.9728    | 0.6122 |
| 271564    | NM_173028.3    | vacuolar protein sorting 13A (yeast)                           | 3.3181    | 5.4093    | 0.6134 |
| 68861     | NM_001033145.2 | RIKEN cDNA 1190002N15 gene                                     | 18.2794   | 28.9826   | 0.6307 |
| 77057     | NM_029858.2    | stonin 1                                                       | 13.2659   | 20.9501   | 0.6332 |
| 54127     | NM_016844.2    | ribosomal protein S28                                          | 718.3538  | 452.7200  | 1.5868 |
| 667682    | XM_991853.3    | predicted gene 8759                                            | 1085.2008 | 683.1858  | 1.5884 |
| 14455     | NR_002840.2    | growth arrest specific 5                                       | 65.1405   | 40.7494   | 1.5986 |
| 671641    | XM_001479052.2 | predicted gene 10063                                           | 1981.0625 | 1234.7892 | 1.6044 |
| 100042561 | XM_003086748.1 | predicted gene 10177                                           | 175.4771  | 109.3654  | 1.6045 |
| 100042561 | XM_001478520.2 | predicted gene 10177                                           | 175.4771  | 109.3654  | 1.6045 |
| 100046297 | XM_001477362.2 | -                                                              | 703.1160  | 436.4319  | 1.6111 |
| 100043718 | XM_001480721.2 | predicted gene 4604                                            | 236.1249  | 146.3981  | 1.6129 |
| 14775     | NM_008160.5    | glutathione peroxidase 1                                       | 92.2788   | 57.2039   | 1.6132 |
| 12859     | NM_009942.2    | cytochrome c oxidase, subunit Vb                               | 141.0200  | 87.3991   | 1.6135 |
| 54217     | NM_018730.3    | ribosomal protein L36                                          | 284.0859  | 175.7512  | 1.6164 |
| 30055     | NM_013895.4    | translocase of inner mitochondrial membrane 13 homolog (yeast) | 59.4914   | 36.7882   | 1.6171 |

|           |                |                                                                                      |           |          |        |
|-----------|----------------|--------------------------------------------------------------------------------------|-----------|----------|--------|
| 635470    | XM_003086282.1 | predicted gene 14407                                                                 | 157.9373  | 97.5871  | 1.6184 |
| 100046079 | XM_001475417.2 | -                                                                                    | 166.5536  | 102.7729 | 1.6206 |
| 27370     | NM_013765.2    | ribosomal protein S26                                                                | 1431.4740 | 881.8388 | 1.6233 |
| 67673     | NM_026305.2    | transcription elongation factor B (SIII), polypeptide 2                              | 147.6390  | 90.6721  | 1.6283 |
| 665533    | XM_003086398.1 | predicted gene 13004                                                                 | 529.7444  | 324.9924 | 1.6300 |
| 665533    | XM_977600.2    | predicted gene 13004                                                                 | 529.7444  | 324.9924 | 1.6300 |
| 546695    | XM_003086080.1 | predicted gene, 16519                                                                | 106.6450  | 65.3828  | 1.6311 |
| 545487    | XM_619852.4    | predicted gene 14439                                                                 | 156.3150  | 95.8047  | 1.6316 |
| 16206     | NM_008377.2    | leucine-rich repeats and immunoglobulin-like domains 1                               | 49.2302   | 30.1324  | 1.6338 |
| 20335     | NM_011343.3    | SEC61, gamma subunit                                                                 | 104.4851  | 63.9293  | 1.6344 |
| 19981     | NM_009084.4    | ribosomal protein L37a                                                               | 536.2309  | 328.0250 | 1.6347 |
| 18034     | NM_001177370.1 | nuclear factor of kappa light polypeptide gene enhancer in B-cells 2, p49/p100       | 74.7410   | 45.7093  | 1.6351 |
| 15980     | NM_008338.3    | interferon gamma receptor 2                                                          | 35.3064   | 21.5783  | 1.6362 |
| 18034     | NM_001177369.1 | nuclear factor of kappa light polypeptide gene enhancer in B-cells 2, p49/p100       | 73.8610   | 45.0676  | 1.6389 |
| 18034     | NM_019408.3    | nuclear factor of kappa light polypeptide gene enhancer in B-cells 2, p49/p100       | 70.1387   | 42.7890  | 1.6392 |
| 72338     | NM_028203.1    | WD repeat domain 89                                                                  | 77.4768   | 47.2237  | 1.6406 |
| 57294     | NM_027015.4    | ribosomal protein S27                                                                | 683.5674  | 415.9998 | 1.6432 |
| 100043813 | NM_001190258.1 | predicted gene 9846                                                                  | 676.2565  | 411.5506 | 1.6432 |
| 100048613 | XM_001480380.2 | -                                                                                    | 107.3612  | 65.2260  | 1.6460 |
| 67126     | NM_025983.3    | ATP synthase, H <sup>+</sup> transporting, mitochondrial F1 complex, epsilon subunit | 97.9056   | 59.4226  | 1.6476 |
| 12857     | NM_009941.2    | cytochrome c oxidase subunit IV isoform 1                                            | 312.4543  | 189.3574 | 1.6501 |
| 27425     | NM_013795.5    | ATP synthase, H <sup>+</sup> transporting, mitochondrial F0 complex, subunit g       | 227.3541  | 137.6219 | 1.6520 |
| 100042348 | XM_001478455.2 | predicted gene 10221                                                                 | 234.8841  | 142.1616 | 1.6522 |
| 230075    | NM_001033305.2 | NADH dehydrogenase (ubiquinone) 1 beta subcomplex, 6                                 | 89.4306   | 54.0857  | 1.6535 |
| 100503897 | XR_107153.1    | predicted gene, 19947                                                                | 161.3130  | 97.2955  | 1.6580 |
| 100503897 | XR_105996.1    | predicted gene, 19947                                                                | 161.3130  | 97.2955  | 1.6580 |

|           |                |                                                                          |           |           |        |
|-----------|----------------|--------------------------------------------------------------------------|-----------|-----------|--------|
| 69878     | NM_027246.1    | small nuclear ribonucleoprotein polypeptide F                            | 105.8570  | 63.8354   | 1.6583 |
| 17133     | NM_010755.3    | v-maf musculoaponeurotic fibrosarcoma oncogene family, protein F (avian) | 22.5600   | 13.5280   | 1.6677 |
| 12010     | NM_009735.3    | beta-2 microglobulin                                                     | 363.5380  | 217.7566  | 1.6695 |
| 99382     | NM_178890.3    | ankyrin repeat and BTB (POZ) domain containing 2                         | 7.1917    | 4.3023    | 1.6716 |
| 12866     | NM_009945.3    | cytochrome c oxidase, subunit VIIa 2                                     | 156.6245  | 93.5164   | 1.6748 |
| 666642    | XM_985134.3    | predicted pseudogene 8210                                                | 93.1370   | 55.5507   | 1.6766 |
| 629750    | NR_033523.1    | predicted gene 11517                                                     | 130.3621  | 77.7199   | 1.6773 |
| 13014     | NM_007793.3    | cystatin B                                                               | 234.4187  | 139.6702  | 1.6784 |
| 751556    | NR_030451.1    | microRNA 682                                                             | 435.4102  | 259.3550  | 1.6788 |
| 100040259 | NM_001111330.1 | predicted pseudogene 16379                                               | 248.8759  | 147.5966  | 1.6862 |
| 57294     | NR_033727.1    | ribosomal protein S27                                                    | 344.5862  | 204.2557  | 1.6870 |
| 192657    | NM_138953.2    | elongation factor RNA polymerase II 2                                    | 15.9917   | 9.4558    | 1.6912 |
| 66491     | NM_025593.1    | polymerase (RNA) II (DNA directed) polypeptide L                         | 17.0794   | 10.0725   | 1.6956 |
| 67945     | NM_018860.4    | ribosomal protein L41                                                    | 2637.6470 | 1554.9638 | 1.6963 |
| 17392     | NM_010809.1    | matrix metalloproteinase 3                                               | 42.4850   | 24.9785   | 1.7009 |
| 233016    | NM_144923.3    | biliverdin reductase B (flavin reductase (NADPH))                        | 32.8141   | 19.2852   | 1.7015 |
| 19944     | NM_009082.2    | ribosomal protein L29                                                    | 110.8143  | 64.9454   | 1.7063 |
| 21929     | NM_001166402.1 | tumor necrosis factor, alpha-induced protein 3                           | 9.5689    | 5.5609    | 1.7208 |
| 67184     | NM_023312.2    | NADH dehydrogenase (ubiquinone) 1 alpha subcomplex, 13                   | 19.4337   | 11.2887   | 1.7215 |
| 20656     | NM_013671.3    | superoxide dismutase 2, mitochondrial                                    | 29.2301   | 16.9286   | 1.7267 |
| 223881    | NM_172612.3    | Rho family GTPase 1                                                      | 87.7922   | 50.8359   | 1.7270 |
| 21929     | NM_009397.3    | tumor necrosis factor, alpha-induced protein 3                           | 9.4206    | 5.4543    | 1.7272 |
| 665964    | XM_980604.3    | predicted gene 7866                                                      | 522.4457  | 302.1944  | 1.7288 |
| 22186     | NM_019883.3    | ubiquitin A-52 residue ribosomal protein fusion product 1                | 1030.7802 | 595.3682  | 1.7313 |
| 100039782 | XM_003086738.1 | predicted gene 10709                                                     | 131.6384  | 76.0086   | 1.7319 |
| 665964    | XM_003086743.1 | predicted gene 7866                                                      | 530.0628  | 305.8558  | 1.7330 |
| 11927     | NM_009720.2    | ATX1 (antioxidant protein 1) homolog 1 (yeast)                           | 63.5819   | 36.6762   | 1.7336 |
| 67916     | NM_080555.2    | phosphatidic acid phosphatase type 2B                                    | 23.7194   | 13.6538   | 1.7372 |
| 17319     | NM_010798.2    | macrophage migration inhibitory factor                                   | 600.4224  | 343.1800  | 1.7496 |

|           |                |                                                    |           |           |        |
|-----------|----------------|----------------------------------------------------|-----------|-----------|--------|
| 230073    | NM_172689.3    | DEAD (Asp-Glu-Ala-Asp) box polypeptide 58          | 9.9966    | 5.7019    | 1.7532 |
| 20422     | NM_009169.2    | split hand/foot malformation (ectrodactyly) type 1 | 189.0396  | 107.7058  | 1.7551 |
| 629957    | XM_003086273.1 | predicted gene 14303                               | 507.7795  | 289.1612  | 1.7560 |
| 100504654 | XR_105586.1    | predicted gene 10736                               | 1840.2606 | 1046.0660 | 1.7592 |
| 100504654 | XR_105587.1    | predicted gene 10736                               | 1911.2104 | 1086.3963 | 1.7592 |
| 100504654 | XR_106826.1    | predicted gene 10736                               | 1778.6007 | 1010.8844 | 1.7595 |
| 100504654 | XR_106827.1    | predicted gene 10736                               | 1844.7812 | 1048.4987 | 1.7595 |
| 100038969 | XM_001472037.2 | predicted gene 14958                               | 1600.4838 | 908.9360  | 1.7608 |
| 626048    | XM_001473380.2 | predicted pseudogene 6646                          | 1601.3925 | 908.9360  | 1.7618 |
| 100503567 | XM_003085762.1 | predicted gene 11694                               | 209.1386  | 118.6965  | 1.7620 |
| 100503567 | XM_003085509.1 | predicted gene 11694                               | 209.1386  | 118.6965  | 1.7620 |
| 434460    | XM_001477611.2 | predicted gene 5623                                | 96.9986   | 54.7627   | 1.7713 |
| 434460    | XM_001477346.2 | predicted gene 5623                                | 96.9986   | 54.7627   | 1.7713 |
| 20200     | NM_011313.2    | S100 calcium binding protein A6 (calyclin)         | 729.7546  | 411.8745  | 1.7718 |
| 67067     | NM_001164216.1 | reactive oxygen species modulator 1                | 41.9669   | 23.6771   | 1.7725 |
| 12864     | NM_053071.2    | cytochrome c oxidase, subunit VIc                  | 211.6069  | 119.3407  | 1.7731 |
| 665032    | XM_974069.2    | predicted gene 13841                               | 123.4288  | 69.4725   | 1.7767 |
| 665032    | XM_991641.2    | predicted gene 13841                               | 123.1820  | 69.3078   | 1.7773 |
| 66379     | NM_183256.3    | RIKEN cDNA 2310016M24 gene                         | 34.5307   | 19.4212   | 1.7780 |
| 434843    | XM_486761.5    | predicted pseudogene 5642                          | 1693.9502 | 952.3672  | 1.7787 |
| 665463    | XM_977110.3    | predicted pseudogene 7643                          | 1693.9502 | 952.3672  | 1.7787 |
| 665611    | XM_978135.3    | predicted pseudogene 7711                          | 1693.9502 | 952.3672  | 1.7787 |
| 665522    | XM_977540.3    | predicted pseudogene 7671                          | 1693.9502 | 952.3672  | 1.7787 |
| 665579    | XM_977918.3    | predicted pseudogene 7698                          | 1693.9502 | 952.3672  | 1.7787 |
| 665032    | XM_003085349.1 | predicted gene 13841                               | 123.6729  | 69.4848   | 1.7799 |
| 665032    | XM_003086489.1 | predicted gene 13841                               | 123.4220  | 69.3181   | 1.7805 |
| 382265    | XM_356374.5    | predicted gene 5167                                | 99.8413   | 56.0350   | 1.7818 |
| 100043714 | XM_003086243.1 | predicted pseudogene 10774                         | 55.6842   | 31.2394   | 1.7825 |
| 100043714 | XM_001480774.2 | predicted pseudogene 10774                         | 55.6842   | 31.2394   | 1.7825 |
| 629957    | XM_894924.4    | predicted gene 14303                               | 818.9727  | 458.8247  | 1.7849 |

|           |                |                                                               |           |           |        |
|-----------|----------------|---------------------------------------------------------------|-----------|-----------|--------|
| 54405     | NM_019443.2    | NADH dehydrogenase (ubiquinone) 1 alpha subcomplex, 1         | 40.6538   | 22.7750   | 1.7850 |
| 20198     | NM_011311.2    | S100 calcium binding protein A4                               | 2385.4436 | 1331.7804 | 1.7912 |
| 17991     | NM_010885.4    | NADH dehydrogenase (ubiquinone) 1 alpha subcomplex, 2         | 116.5165  | 64.9515   | 1.7939 |
| 66142     | NM_025379.2    | cytochrome c oxidase subunit VIIb                             | 88.5289   | 49.2034   | 1.7992 |
| 100039782 | XM_001473311.2 | predicted gene 10709                                          | 98.9061   | 54.9447   | 1.8001 |
| 13198     | NM_007837.3    | DNA-damage inducible transcript 3                             | 21.3312   | 11.8400   | 1.8016 |
| 11839     | NM_009704.3    | amphiregulin                                                  | 13.9534   | 7.7248    | 1.8063 |
| 319238    | XR_107318.1    | RIKEN cDNA 9330123L03 gene                                    | 5.1955    | 2.8542    | 1.8203 |
| 20090     | NM_009093.2    | ribosomal protein S29                                         | 601.5951  | 330.0521  | 1.8227 |
| 433941    | XM_003086189.1 | predicted gene 5561                                           | 108.9998  | 59.7879   | 1.8231 |
| 433941    | XM_001478364.2 | predicted gene 5561                                           | 108.9998  | 59.7879   | 1.8231 |
| 56187     | NM_019519.2    | Rab geranylgeranyl transferase, a subunit                     | 6.1415    | 3.3628    | 1.8263 |
| 100503055 | XM_003085327.1 | -                                                             | 50.2746   | 27.5242   | 1.8266 |
| 100043718 | XM_003086523.1 | predicted gene 4604                                           | 237.7590  | 130.0606  | 1.8281 |
| 320415    | NM_177157.4    | GTP cyclohydrolase I feedback regulator                       | 84.2406   | 46.0753   | 1.8283 |
| 11983     | NM_007512.3    | ATPase inhibitory factor 1                                    | 56.6753   | 30.9422   | 1.8317 |
| 622707    | XM_001475711.2 | predicted gene 6344                                           | 71.2296   | 38.8333   | 1.8342 |
| 102644    | NM_178644.3    | OAF homolog (Drosophila)                                      | 35.9188   | 19.5807   | 1.8344 |
| 17873     | NM_008655.1    | growth arrest and DNA-damage-inducible 45 beta                | 19.2499   | 10.4934   | 1.8345 |
| 66169     | NM_025394.3    | translocase of outer mitochondrial membrane 7 homolog (yeast) | 68.1720   | 36.9712   | 1.8439 |
| 68949     | NM_001081005.1 | RIKEN cDNA 1500012F01 gene                                    | 60.4516   | 32.7572   | 1.8454 |
| 72655     | XM_986352.2    | small nucleolar RNA host gene 5                               | 46.3329   | 25.0715   | 1.8480 |
| 217344    | NM_172572.3    | rhomboid 5 homolog 2 (Drosophila)                             | 4.4054    | 2.3712    | 1.8578 |
| 13197     | NM_007836.1    | growth arrest and DNA-damage-inducible 45 alpha               | 9.3944    | 5.0447    | 1.8622 |
| 66915     | NR_028108.1    | myeloma overexpressed 2                                       | 27.9426   | 15.0044   | 1.8623 |
| 217344    | NM_001167680.1 | rhomboid 5 homolog 2 (Drosophila)                             | 4.6732    | 2.5079    | 1.8634 |
| 72655     | XM_925560.3    | small nucleolar RNA host gene 5                               | 46.0753   | 24.7247   | 1.8635 |
| 12609     | NM_007679.4    | CCAAT/enhancer binding protein (C/EBP), delta                 | 11.3447   | 6.0813    | 1.8655 |
| 69920     | NM_027259.1    | polymerase (RNA) II (DNA directed) polypeptide I              | 22.6379   | 12.1145   | 1.8687 |

|           |                |                                                                                    |          |          |        |
|-----------|----------------|------------------------------------------------------------------------------------|----------|----------|--------|
| 18036     | NM_010908.4    | nuclear factor of kappa light polypeptide gene enhancer in B-cells inhibitor, beta | 11.1049  | 5.9397   | 1.8696 |
| 20308     | NM_011338.2    | chemokine (C-C motif) ligand 9                                                     | 17.4949  | 9.3368   | 1.8738 |
| 100503653 | XR_104731.1    | predicted gene 14036                                                               | 102.2717 | 54.5805  | 1.8738 |
| 13167     | NM_007830.4    | diazepam binding inhibitor                                                         | 152.6526 | 81.3535  | 1.8764 |
| 14790     | NM_013535.1    | gene rich cluster, C10 gene                                                        | 20.6090  | 10.9587  | 1.8806 |
| 66915     | NM_001163425.1 | myeloma overexpressed 2                                                            | 47.8378  | 25.2243  | 1.8965 |
| 68040     | NM_024215.2    | zinc finger protein 593                                                            | 5.6453   | 2.9763   | 1.8968 |
| 17384     | NM_019471.2    | matrix metalloproteinase 10                                                        | 36.3866  | 19.1835  | 1.8968 |
| 66481     | NM_025587.2    | ribosomal protein S21                                                              | 735.2156 | 386.8005 | 1.9008 |
| 69895     | NR_028574.1    | small nucleolar RNA host gene 8                                                    | 27.6465  | 14.5265  | 1.9032 |
| 83673     | NR_002896.3    | small nucleolar RNA host gene (non-protein coding) 1                               | 128.6195 | 67.4759  | 1.9062 |
| 18049     | NM_013609.2    | nerve growth factor                                                                | 16.0144  | 8.3903   | 1.9087 |
| 22272     | NM_025352.2    | ubiquinol-cytochrome c reductase, complex III subunit VII                          | 90.2122  | 47.2625  | 1.9087 |
| 30059     | NM_013899.2    | translocase of inner mitochondrial membrane 10 homolog (yeast)                     | 56.7326  | 29.7171  | 1.9091 |
| 100041286 | XR_106636.1    | predicted gene 11974                                                               | 25.8980  | 13.5425  | 1.9123 |
| 100041286 | XR_105435.1    | predicted gene 11974                                                               | 25.8980  | 13.5425  | 1.9123 |
| 74732     | NM_001163590.1 | syntaxin 11                                                                        | 7.2620   | 3.7881   | 1.9170 |
| 100504319 | XM_003086228.1 | -                                                                                  | 207.0361 | 107.9865 | 1.9172 |
| 100504319 | XM_003084494.1 | -                                                                                  | 207.0361 | 107.9865 | 1.9172 |
| 100503669 | XM_003086525.1 | -                                                                                  | 83.2977  | 43.3896  | 1.9198 |
| 100503669 | XM_003084644.1 | -                                                                                  | 83.2977  | 43.3896  | 1.9198 |
| 13167     | NM_001037999.2 | diazepam binding inhibitor                                                         | 135.1238 | 70.3696  | 1.9202 |
| 74732     | NM_001163591.1 | syntaxin 11                                                                        | 7.5787   | 3.9447   | 1.9212 |
| 20568     | NM_011414.3    | secretory leukocyte peptidase inhibitor                                            | 83.3139  | 43.3349  | 1.9226 |
| 80859     | NM_030612.3    | nuclear factor of kappa light polypeptide gene enhancer in B-cells inhibitor, zeta | 3.9502   | 2.0538   | 1.9233 |
| 19698     | NM_009046.2    | avian reticuloendotheliosis viral (v-rel) oncogene related B                       | 14.7822  | 7.6782   | 1.9252 |
| 100041859 | XM_003086090.1 | predicted gene 3550                                                                | 55.8534  | 28.9648  | 1.9283 |
| 100041859 | XM_001477476.2 | predicted gene 3550                                                                | 55.8534  | 28.9648  | 1.9283 |



|           |                |                                                                                               |          |          |        |
|-----------|----------------|-----------------------------------------------------------------------------------------------|----------|----------|--------|
| 22038     | NM_011636.2    | phospholipid scramblase 1                                                                     | 49.7638  | 25.7935  | 1.9293 |
| 15040     | NM_010398.3    | histocompatibility 2, T region locus 23                                                       | 10.7368  | 5.5581   | 1.9317 |
| 68763     | NR_015536.1    | RIKEN cDNA 1110038B12 gene                                                                    | 160.2223 | 82.5510  | 1.9409 |
| 18049     | NM_001112698.1 | nerve growth factor                                                                           | 18.6172  | 9.5834   | 1.9427 |
| 74732     | NM_029075.1    | syntaxin 11                                                                                   | 7.0690   | 3.6370   | 1.9436 |
| 80859     | NM_001159395.1 | nuclear factor of kappa light polypeptide gene enhancer in B-cells inhibitor, zeta            | 4.3422   | 2.2293   | 1.9478 |
| 100503826 | XR_107649.1    | predicted gene 13075                                                                          | 22.0599  | 11.3206  | 1.9487 |
| 100503826 | XR_104900.1    | predicted gene 13075                                                                          | 22.0599  | 11.3206  | 1.9487 |
| 66141     | NM_025378.2    | interferon induced transmembrane protein 3                                                    | 157.5462 | 80.6882  | 1.9525 |
| 80859     | NM_001159394.1 | nuclear factor of kappa light polypeptide gene enhancer in B-cells inhibitor, zeta            | 4.1437   | 2.1155   | 1.9587 |
| 68763     | NR_027943.1    | RIKEN cDNA 1110038B12 gene                                                                    | 142.2872 | 72.5673  | 1.9608 |
| 12578     | NM_001040654.1 | cyclin-dependent kinase inhibitor 2A                                                          | 33.7588  | 17.1650  | 1.9667 |
| 100045766 | XM_001474415.2 | predicted gene 10126                                                                          | 123.5835 | 62.6092  | 1.9739 |
| 100045766 | XM_003084933.1 | predicted gene 10126                                                                          | 123.5835 | 62.6092  | 1.9739 |
| 434394    | XM_915072.3    | predicted gene 5614                                                                           | 78.8342  | 39.9309  | 1.9743 |
| 436081    | XM_001004069.3 | predicted gene 5745                                                                           | 26.9668  | 13.5951  | 1.9836 |
| 436081    | XM_488179.5    | predicted gene 5745                                                                           | 26.9668  | 13.5951  | 1.9836 |
| 100503585 | XM_003086438.1 | -                                                                                             | 334.0994 | 168.0256 | 1.9884 |
| 100503585 | XM_003084617.1 | -                                                                                             | 334.0994 | 168.0256 | 1.9884 |
| 12578     | NM_009877.2    | cyclin-dependent kinase inhibitor 2A                                                          | 34.1776  | 17.0990  | 1.9988 |
| 381155    | XR_035375.1    | RIKEN cDNA 9630014M24 gene                                                                    | 3.0137   | 1.5066   | 2.0003 |
| 66293     | NR_027819.1    | RIKEN cDNA 1810032008 gene                                                                    | 8.9850   | 4.4602   | 2.0145 |
| 11435     | NM_007389.4    | cholinergic receptor, nicotinic, alpha polypeptide 1 (muscle)                                 | 1.8119   | 0.8826   | 2.0529 |
| 100504928 | XR_106975.1    | -                                                                                             | 1.9112   | 0.9253   | 2.0655 |
| 230738    | NM_153159.2    | zinc finger CCCH type containing 12A                                                          | 6.5553   | 3.1600   | 2.0745 |
| 108153    | NM_001003911.2 | a disintegrin-like and metallopeptidase (reprolysin type) with thrombospondin type 1 motif, 7 | 4.0967   | 1.9739   | 2.0755 |
| 320207    | NM_177320.2    | phosphoinositide-3-kinase, regulatory subunit 5, p101                                         | 15.2432  | 7.3159   | 2.0836 |
| 19260     | NM_008979.1    | protein tyrosine phosphatase, non-receptor type 22 (lymphoid)                                 | 6.3087   | 2.9870   | 2.1120 |

|           |                |                                                                                       |          |          |        |
|-----------|----------------|---------------------------------------------------------------------------------------|----------|----------|--------|
| 668092    | XM_994269.1    | predicted gene 8973                                                                   | 58.7021  | 27.6645  | 2.1219 |
| 15937     | NM_133662.2    | immediate early response 3                                                            | 58.4487  | 27.5021  | 2.1252 |
| 434394    | XM_486208.5    | predicted gene 5614                                                                   | 73.9478  | 34.7634  | 2.1272 |
| 76964     | NM_029816.2    | RIKEN cDNA 2610028H24 gene                                                            | 3.8487   | 1.8077   | 2.1291 |
| 12916     | NM_001110853.1 | cAMP responsive element modulator                                                     | 2.4338   | 1.1359   | 2.1427 |
| 12916     | NM_001110857.1 | cAMP responsive element modulator                                                     | 2.2933   | 1.0690   | 2.1453 |
| 72275     | NM_028179.1    | RIKEN cDNA 2200002D01 gene                                                            | 25.1042  | 11.6382  | 2.1571 |
| 56695     | NM_025580.2    | paroxysmal nonkinesigenic dyskinesia                                                  | 8.5520   | 3.9558   | 2.1619 |
| 668092    | XM_003085977.1 | predicted gene 8973                                                                   | 58.2089  | 26.8741  | 2.1660 |
| 100504742 | XM_003086332.1 | -                                                                                     | 117.6074 | 52.9206  | 2.2223 |
| 18037     | NM_008690.3    | nuclear factor of kappa light polypeptide gene enhancer in B-cells inhibitor, epsilon | 18.0281  | 8.0801   | 2.2312 |
| 12856     | NM_001017429.2 | cytochrome c oxidase, subunit XVII assembly protein homolog (yeast)                   | 25.4228  | 11.3069  | 2.2484 |
| 66594     | NM_025650.2    | ubiquinol-cytochrome c reductase, complex III subunit XI                              | 101.8100 | 44.6566  | 2.2798 |
| 57783     | NM_021327.2    | TNFAIP3 interacting protein 1                                                         | 43.2784  | 18.8918  | 2.2909 |
| 18788     | NM_011111.4    | serine (or cysteine) peptidase inhibitor, clade B, member 2                           | 5.7035   | 2.4563   | 2.3220 |
| 20361     | NM_011352.2    | sema domain, immunoglobulin domain (Ig), and GPI membrane anchor, (semaphorin) 7A     | 3.0227   | 1.3017   | 2.3222 |
| 18788     | NM_001174170.1 | serine (or cysteine) peptidase inhibitor, clade B, member 2                           | 5.7580   | 2.4547   | 2.3457 |
| 546663    | XM_915258.4    | predicted pseudogene 5963                                                             | 278.1877 | 118.0584 | 2.3564 |
| 546663    | XM_001002128.3 | predicted pseudogene 5963                                                             | 278.1877 | 118.0584 | 2.3564 |
| 545551    | NR_033629.1    | cDNA sequence BC021767                                                                | 1.5344   | 0.6482   | 2.3673 |
| 100504629 | XM_003086098.1 | predicted gene, 17669                                                                 | 12.2776  | 5.1640   | 2.3775 |
| 319689    | XM_003086426.1 | predicted gene, 17739                                                                 | 1.6810   | 0.7050   | 2.3844 |
| 319689    | XM_003084614.1 | predicted gene, 17739                                                                 | 1.6810   | 0.7050   | 2.3844 |
| 12051     | NM_033601.3    | B-cell leukemia/lymphoma 3                                                            | 4.2058   | 1.7639   | 2.3844 |
| 100503758 | XR_106535.1    | predicted gene, 19876                                                                 | 75.6369  | 31.6424  | 2.3904 |
| 100503758 | XR_105417.1    | predicted gene, 19876                                                                 | 75.6369  | 31.6424  | 2.3904 |
| 26434     | NM_023043.2    | prion protein dublet                                                                  | 1.4915   | 0.6234   | 2.3924 |
| 17748     | NM_013602.3    | metallothionein 1                                                                     | 125.7142 | 52.4440  | 2.3971 |

|        |                |                                                                                     |          |          |        |
|--------|----------------|-------------------------------------------------------------------------------------|----------|----------|--------|
| 69221  | NR_030738.1    | RIKEN cDNA 2410006H16 gene                                                          | 63.5934  | 26.4643  | 2.4030 |
| 257632 | NM_145857.2    | nucleotide-binding oligomerization domain containing 2                              | 1.7822   | 0.7220   | 2.4684 |
| 18035  | NM_010907.2    | nuclear factor of kappa light polypeptide gene enhancer in B-cells inhibitor, alpha | 54.3012  | 21.8327  | 2.4871 |
| 16193  | NM_031168.1    | interleukin 6                                                                       | 2.7637   | 1.0995   | 2.5137 |
| 16878  | NM_001039537.1 | leukemia inhibitory factor                                                          | 9.2464   | 3.6711   | 2.5187 |
| 233552 | NM_201352.2    | glycerophosphodiester phosphodiesterase domain containing 5                         | 3.5449   | 1.4074   | 2.5188 |
| 17395  | NM_013599.2    | matrix metalloproteinase 9                                                          | 1.1058   | 0.4378   | 2.5261 |
| 16878  | NM_008501.2    | leukemia inhibitory factor                                                          | 8.9014   | 3.5099   | 2.5361 |
| 110332 | NM_173449.3    | RIKEN cDNA 4921523A10 gene                                                          | 1.8618   | 0.7240   | 2.5715 |
| 20306  | NM_013654.3    | chemokine (C-C motif) ligand 7                                                      | 144.0293 | 55.3655  | 2.6014 |
| 69749  | XR_107112.1    | RIKEN cDNA 2410004N09 gene                                                          | 15.6704  | 5.9801   | 2.6204 |
| 69749  | XR_105940.1    | RIKEN cDNA 2410004N09 gene                                                          | 15.6704  | 5.9801   | 2.6204 |
| 26434  | NM_001126338.1 | prion protein dublet                                                                | 1.7468   | 0.6616   | 2.6404 |
| 11796  | NM_007464.3    | baculoviral IAP repeat-containing 3                                                 | 2.7367   | 1.0242   | 2.6721 |
| 17750  | NM_008630.2    | metallothionein 2                                                                   | 39.0333  | 14.5985  | 2.6738 |
| 12363  | NM_007609.2    | caspase 4, apoptosis-related cysteine peptidase                                     | 4.9157   | 1.8070   | 2.7204 |
| 56489  | NM_019777.3    | inhibitor of kappaB kinase epsilon                                                  | 10.8508  | 3.9800   | 2.7264 |
| 17386  | NM_008607.2    | matrix metalloproteinase 13                                                         | 8.4810   | 3.0902   | 2.7445 |
| 74013  | NM_028713.1    | raftlin family member 2                                                             | 0.7582   | 0.2700   | 2.8084 |
| 14727  | NM_008147.1    | glycoprotein 49 A                                                                   | 3.6912   | 1.2974   | 2.8451 |
| 20296  | NM_011333.3    | chemokine (C-C motif) ligand 2                                                      | 752.1989 | 255.4061 | 2.9451 |
| 57875  | NM_020581.2    | angiopoietin-like 4                                                                 | 1.7842   | 0.5978   | 2.9848 |
| 227659 | NM_001177627.1 | solute carrier family 2 (facilitated glucose transporter), member 6                 | 2.6249   | 0.8495   | 3.0899 |
| 76773  | NM_029734.1    | WDYHV motif containing 1                                                            | 8.4159   | 2.7215   | 3.0924 |
| 22329  | NM_011693.3    | vascular cell adhesion molecule 1                                                   | 58.3048  | 18.8018  | 3.1010 |
| 22029  | NM_009421.3    | TNF receptor-associated factor 1                                                    | 17.6218  | 5.5043   | 3.2014 |
| 24088  | NM_011905.3    | toll-like receptor 2                                                                | 4.2713   | 1.3168   | 3.2437 |
| 751530 | NR_030494.1    | -                                                                                   | 48.9708  | 14.9388  | 3.2781 |

|           |                |                                                                                                       |         |        |         |
|-----------|----------------|-------------------------------------------------------------------------------------------------------|---------|--------|---------|
| 227659    | NM_172659.2    | solute carrier family 2 (facilitated glucose transporter), member 6                                   | 2.9099  | 0.8859 | 3.2847  |
| 75614     | XR_105882.1    | RIKEN cDNA 2610019E17 gene                                                                            | 6.6720  | 2.0256 | 3.2938  |
| 414084    | NM_001001495.2 | TNFAIP3 interacting protein 3                                                                         | 6.7889  | 2.0214 | 3.3584  |
| 100217453 | NR_028548.1    | small nucleolar RNA, C/D box 16A                                                                      | 18.7832 | 5.4721 | 3.4325  |
| 14468     | NM_010259.2    | guanylate binding protein 1                                                                           | 1.7816  | 0.5121 | 3.4792  |
| 16149     | NM_010545.3    | CD74 antigen (invariant polypeptide of major histocompatibility complex, class II antigen-associated) | 1.1287  | 0.3215 | 3.5105  |
| 14102     | NM_007987.2    | Fas (TNF receptor superfamily member 6)                                                               | 13.0013 | 3.6861 | 3.5271  |
| 14728     | NM_013532.2    | leukocyte immunoglobulin-like receptor, subfamily B, member 4                                         | 6.6386  | 1.8586 | 3.5719  |
| 16819     | NM_008491.1    | lipocalin 2                                                                                           | 7.4081  | 2.0432 | 3.6257  |
| 14469     | NM_010260.1    | guanylate binding protein 2                                                                           | 2.7460  | 0.6852 | 4.0077  |
| 14528     | NM_008102.3    | GTP cyclohydrolase 1                                                                                  | 1.8177  | 0.4504 | 4.0358  |
| 103142    | NM_153133.2    | retinol dehydrogenase 9                                                                               | 0.4608  | 0.1107 | 4.1606  |
| 100047734 | XM_003086912.1 | -                                                                                                     | 2.0998  | 0.4282 | 4.9036  |
| 408066    | XR_035217.2    | cDNA sequence BC067074                                                                                | 0.1158  | 0.0223 | 5.2008  |
| 408066    | XR_001629.2    | cDNA sequence BC067074                                                                                | 0.1333  | 0.0244 | 5.4608  |
| 15945     | NM_021274.1    | chemokine (C-X-C motif) ligand 10                                                                     | 3.9956  | 0.7027 | 5.6862  |
| 24108     | NM_023137.3    | ubiquitin D                                                                                           | 1.2580  | 0.2103 | 5.9809  |
| 20311     | NM_009141.2    | chemokine (C-X-C motif) ligand 5                                                                      | 14.5530 | 1.9858 | 7.3284  |
| 14825     | NM_008176.3    | chemokine (C-X-C motif) ligand 1                                                                      | 67.9688 | 9.1431 | 7.4339  |
| 20297     | NM_001159738.1 | chemokine (C-C motif) ligand 20                                                                       | 2.3793  | 0.2933 | 8.1133  |
| 20297     | NM_016960.2    | chemokine (C-C motif) ligand 20                                                                       | 2.4925  | 0.2922 | 8.5293  |
| 80287     | NM_030255.3    | apolipoprotein B mRNA editing enzyme, catalytic polypeptide 3                                         | 0.7682  | 0.0844 | 9.1014  |
| 80287     | NM_001160415.1 | apolipoprotein B mRNA editing enzyme, catalytic polypeptide 3                                         | 0.7372  | 0.0810 | 9.1014  |
| 55932     | NM_018734.3    | guanylate binding protein 3                                                                           | 0.9028  | 0.0755 | 11.9618 |
| 73474     | NR_027900.2    | small nucleolar RNA host gene (non-protein coding) 9                                                  | 3.6795  | 0.2721 | 13.5221 |
| 434775    | XR_001556.2    | predicted gene 5636                                                                                   | 0.2217  | 0.0142 | 15.6024 |
| 20210     | NM_011315.3    | serum amyloid A 3                                                                                     | 2.6337  | 0.0000 | Inf     |
| 18606     | NM_001136077.1 | ectonucleotide pyrophosphatase/phosphodiesterase 2                                                    | 0.2264  | 0.0000 | Inf     |

|        |                |                              |        |        |     |
|--------|----------------|------------------------------|--------|--------|-----|
| 16069  | NM_152839.3    | immunoglobulin joining chain | 0.2944 | 0.0000 | Inf |
| 630294 | NM_001177467.1 | predicted gene 7030          | 0.4033 | 0.0000 | Inf |
| 399570 | XR_104919.1    | RIKEN cDNA A730085A09 gene   | 0.1518 | 0.0000 | Inf |
| 229320 | NM_153385.2    | clarin 1                     | 0.3093 | 0.0000 | Inf |
| 229320 | NM_153384.2    | clarin 1                     | 0.3005 | 0.0000 | Inf |
| 229320 | NM_153386.2    | clarin 1                     | 0.3428 | 0.0000 | Inf |
| 12642  | NM_009890.1    | cholesterol 25-hydroxylase   | 0.4174 | 0.0000 | Inf |
